# Supplementary material for: Single crystal X-ray-structurally characterized Mo(vi) complexes of thiophene-appended amide–imine conjugates for optical recognition of calcon and 2-aminobutyric acid
Source: Royal Society of Chemistry journal article supplement (doi:10.1039/d6ra02104b), 2026-05-27
Supplement: d6ra02104b1.pdf [file d6ra02104b1.pdf]

## Electronic Supporting Information (ESI)

### Studies on interactions of X-ray structurally characterized Mo(VI) complexes of thiophene appended amide-imine conjugates: optical recognition of calcon and 2-aminobutyric acid

Sangita Maji, Prasenjit Mandal, Amit Dey, Sudeshna Chatterjee and Debasis Das

*Department of Chemistry, The University of Burdwan, Burdwan, 713104, W.B., India*

#### 1. General method of UV-Vis and fluorescence titration

Stock solution of **M1** and **M2** (20  $\mu$ M) are prepared in DMSO/H<sub>2</sub>O (4/1, v/v, PBS buffer) media, pH 7.4 for UV-Vis and fluorescence titrations. Working solutions of **M1**, **M2**, calcon and 2-aminobutyric acid are prepared from their respective stock solutions. For absorption and emission studies, cells having path length 1cm are used. Fluorescence measurements have been performed using 5 nm x 5 nm slit width.

#### 2. Job's plot from fluorescence experiment

A series of solutions containing **M1**, **M2** and calcon, 2-aminobutyric acid are prepared such that the total concentration of calcon, 2-aminobutyric acid and **M1**, **M2** remained constant (20  $\mu$ M) in all the sets. The mole fractions (*x*) of calcon and 2-aminobutyric acid are varied from 0.1 to 0.9. The fluorescence intensity at 484 nm for **M1**-calcon and **M2** -2-aminobutyric acid at 489 nm are plotted respectively against the mole fraction of calcon and 2-aminobutyric acid.

#### 3. Determination of binding constant

The binding constants of **M1** and **M2** towards sensed molecules (analyte) are determined using Benesi-Hildebrand equation:

$$\frac{F_{max} - F_{min}}{F_x - F_{min}} = 1 + \frac{1}{K[C]^n}$$

Here, **F<sub>min</sub>**, **F<sub>x</sub>** and **F<sub>max</sub>** are the emission intensities of **M1** and **M2** in absence of analyte, at an intermediate analyte concentration, and at a concentration of complete interaction with analyte respectively. **K** is the binding constant, **C** is the concentration of analyte and **n** is the number of analyte bound per crystal molecule (here, **n** = 1). The value of **K** can be determined from the slopes of the plots.

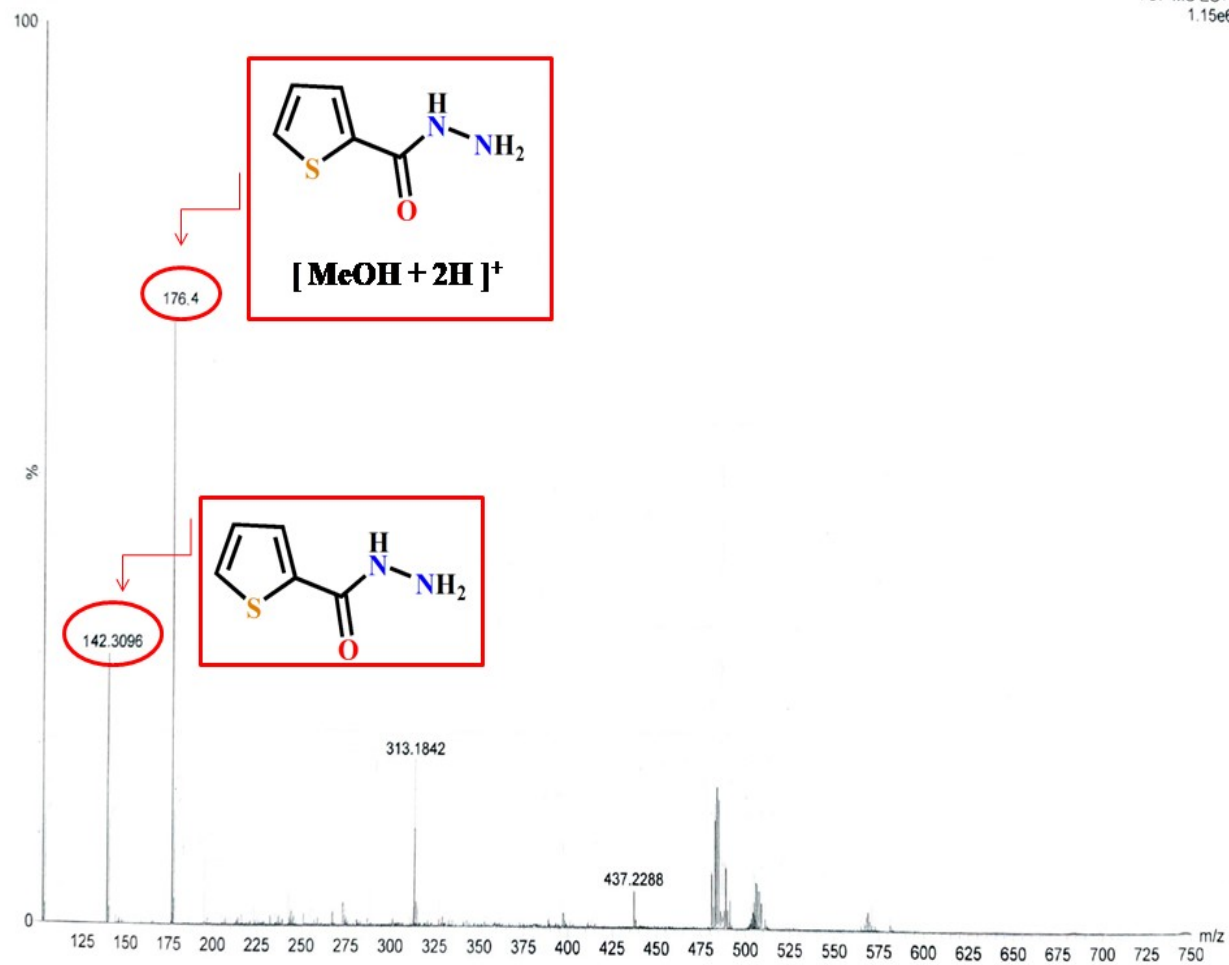

Figure S1a QTOF mass spectrum of TCA

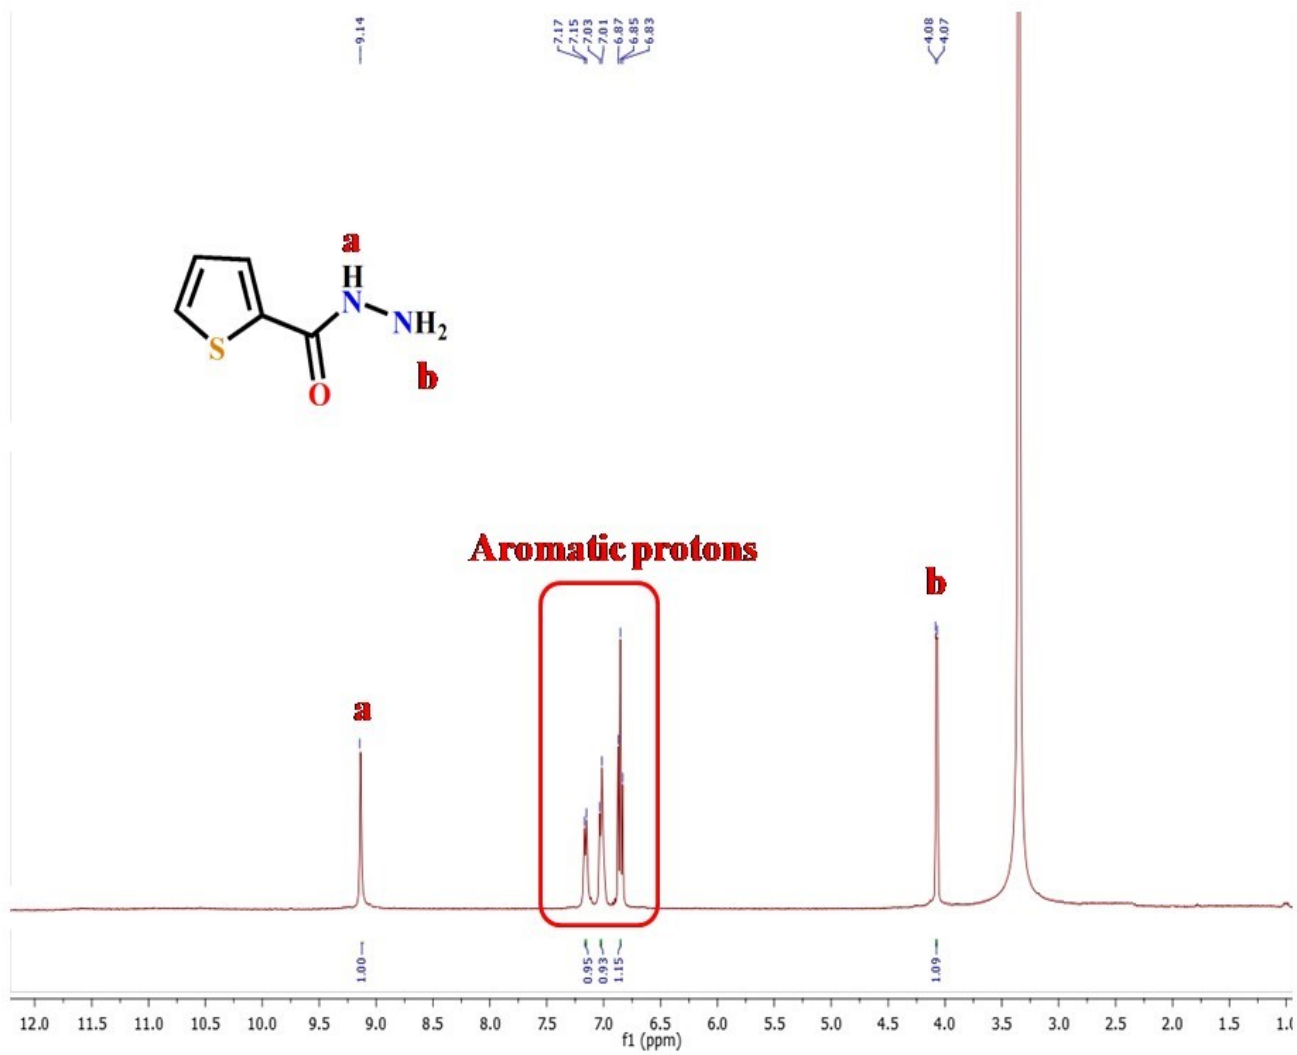

Figure S1b  $^1\text{H}$  NMR spectrum of TCA in  $\text{DMSO-}d_6$

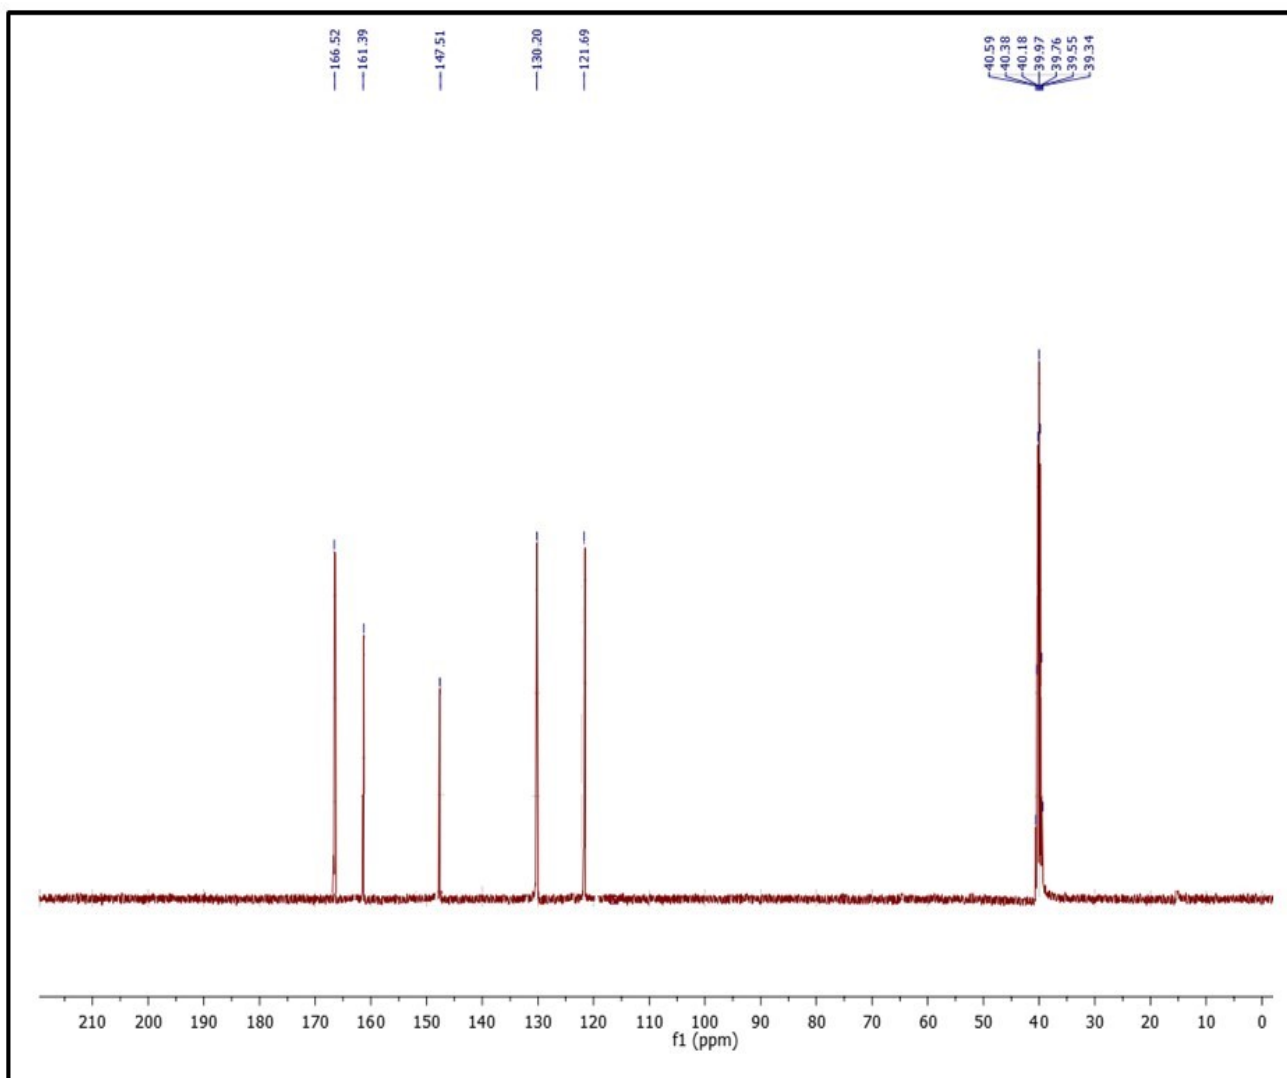

**Figure S1c**  $^{13}\text{C}$  NMR spectrum of TCA

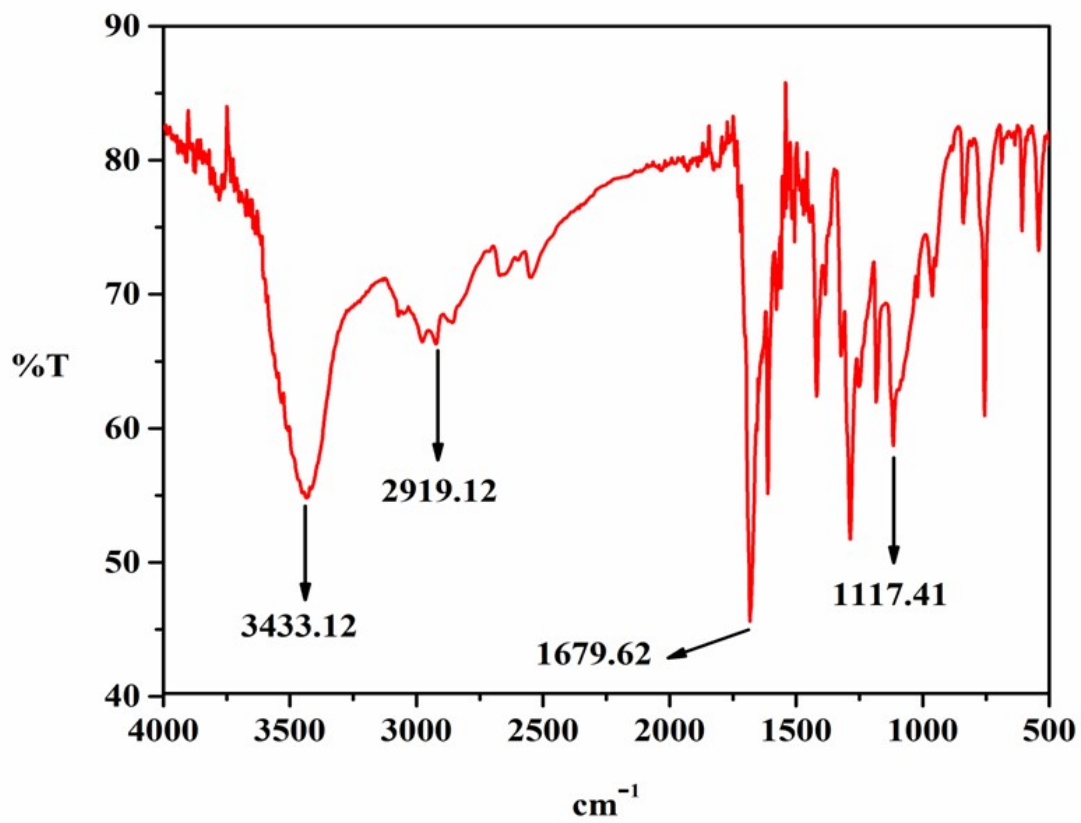

**Figure S1d** FTIR spectrum of TCA

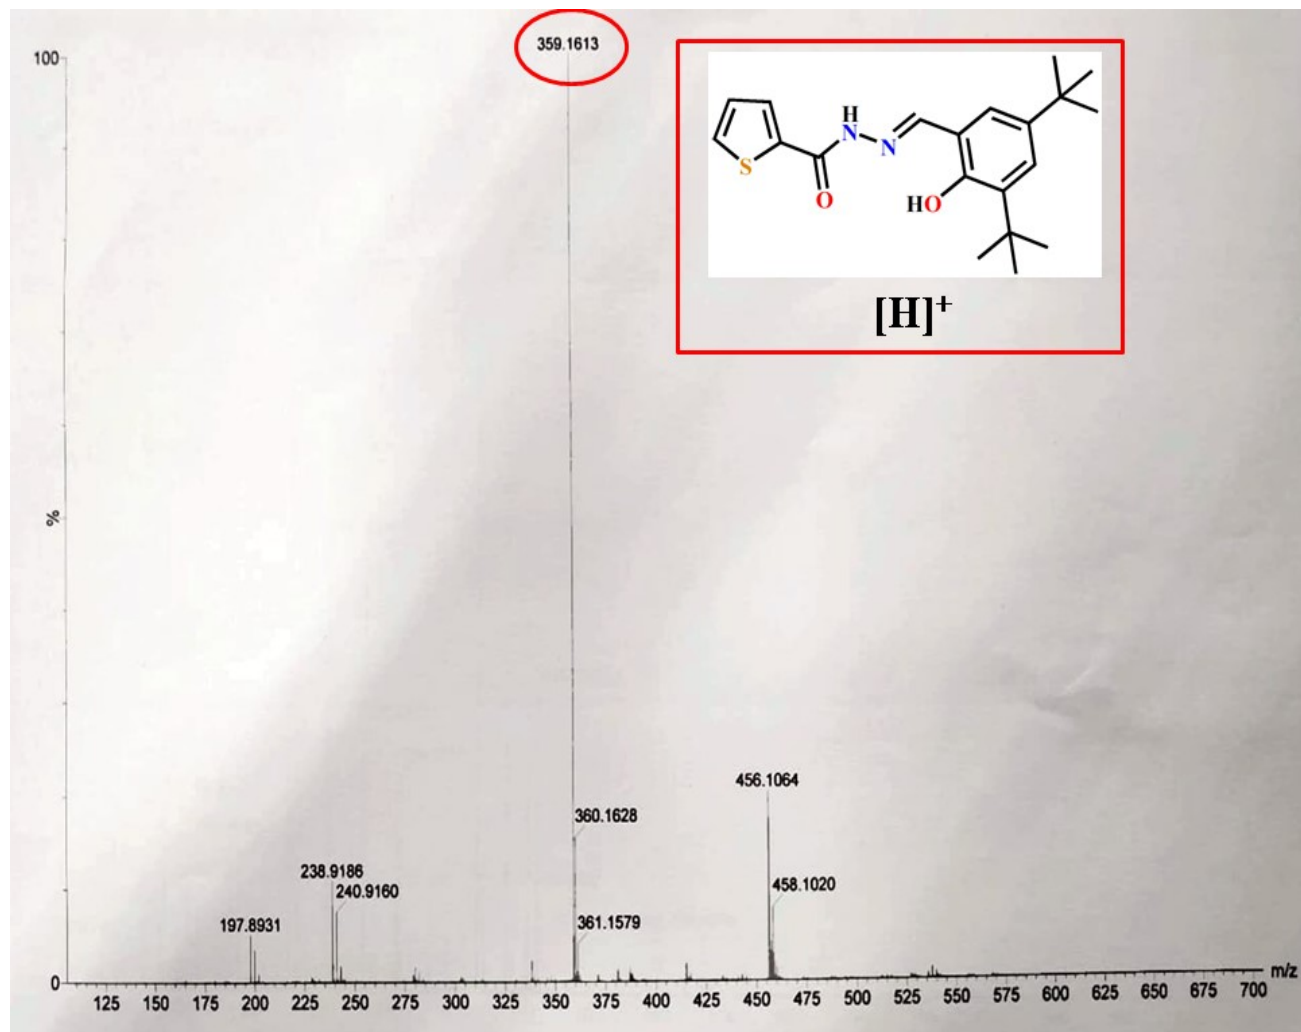

Figure S2a QTOF mass spectrum of L1

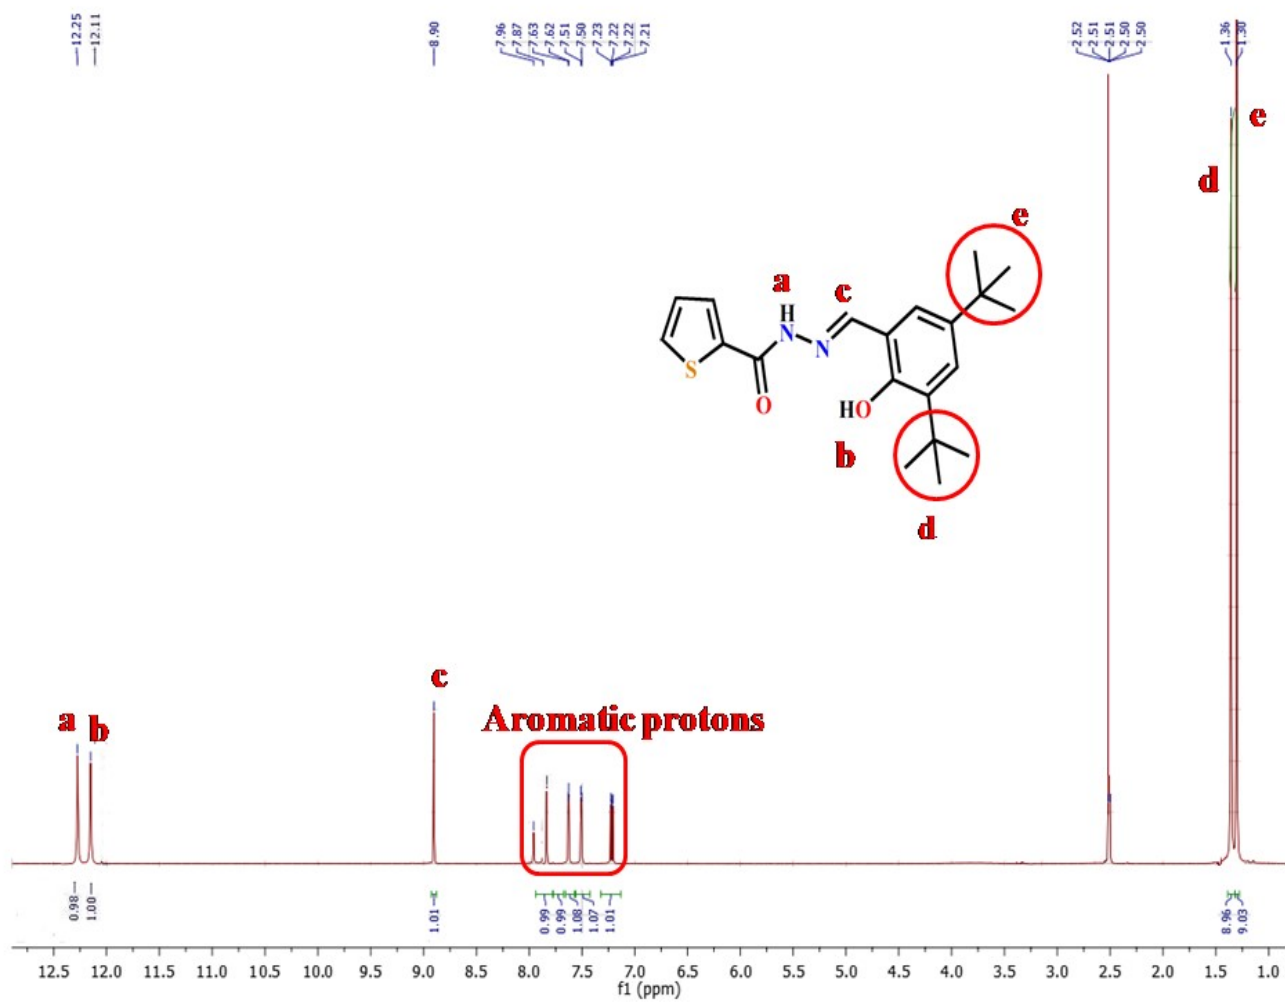

Figure S2b <sup>1</sup>H NMR spectrum of L1 in DMSO-*d*<sub>6</sub>

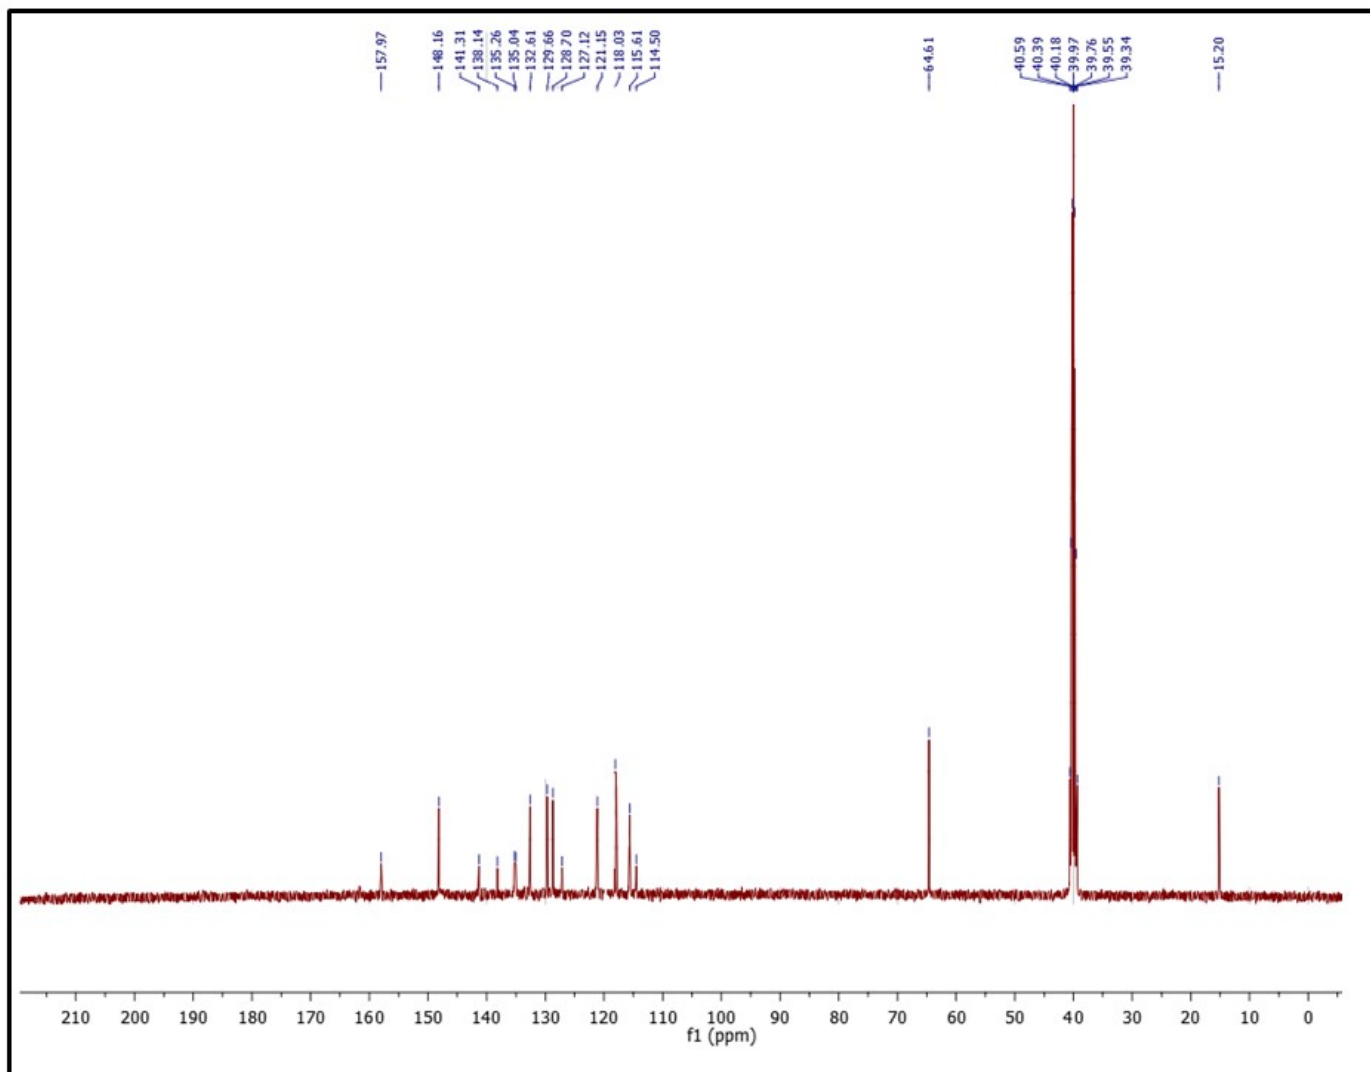

Figure S2c  $^{13}\text{C}$ NMR spectrum of L1

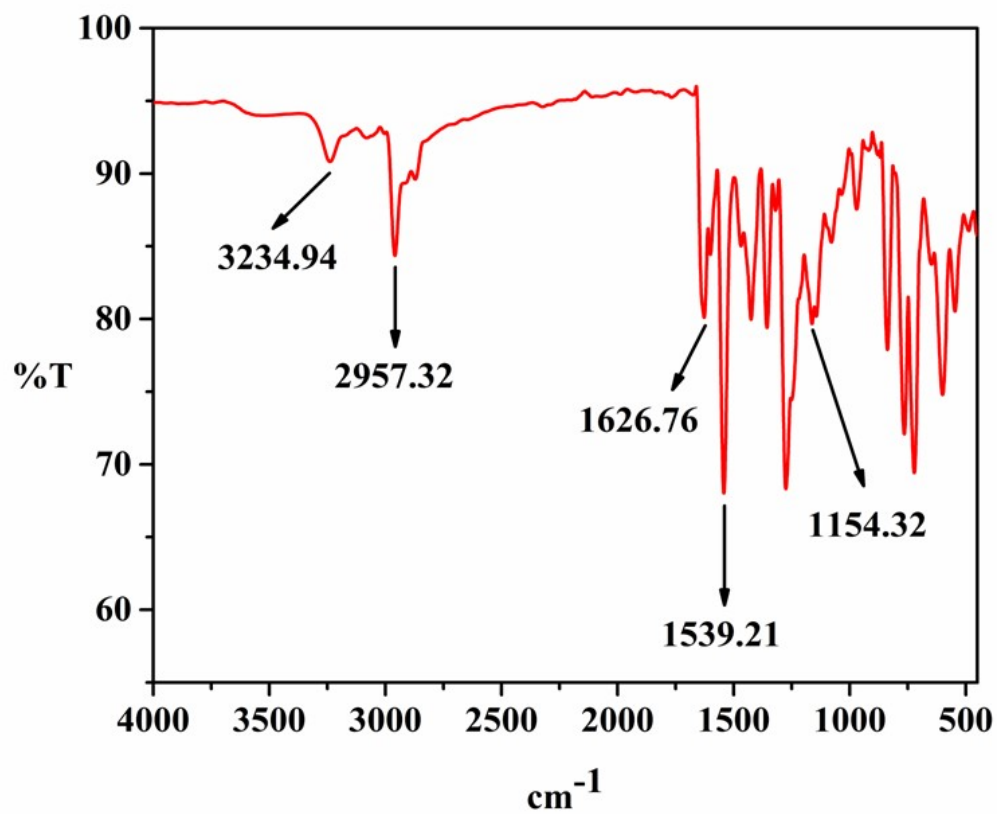

**Figure S2d** FTIR spectrum of L1

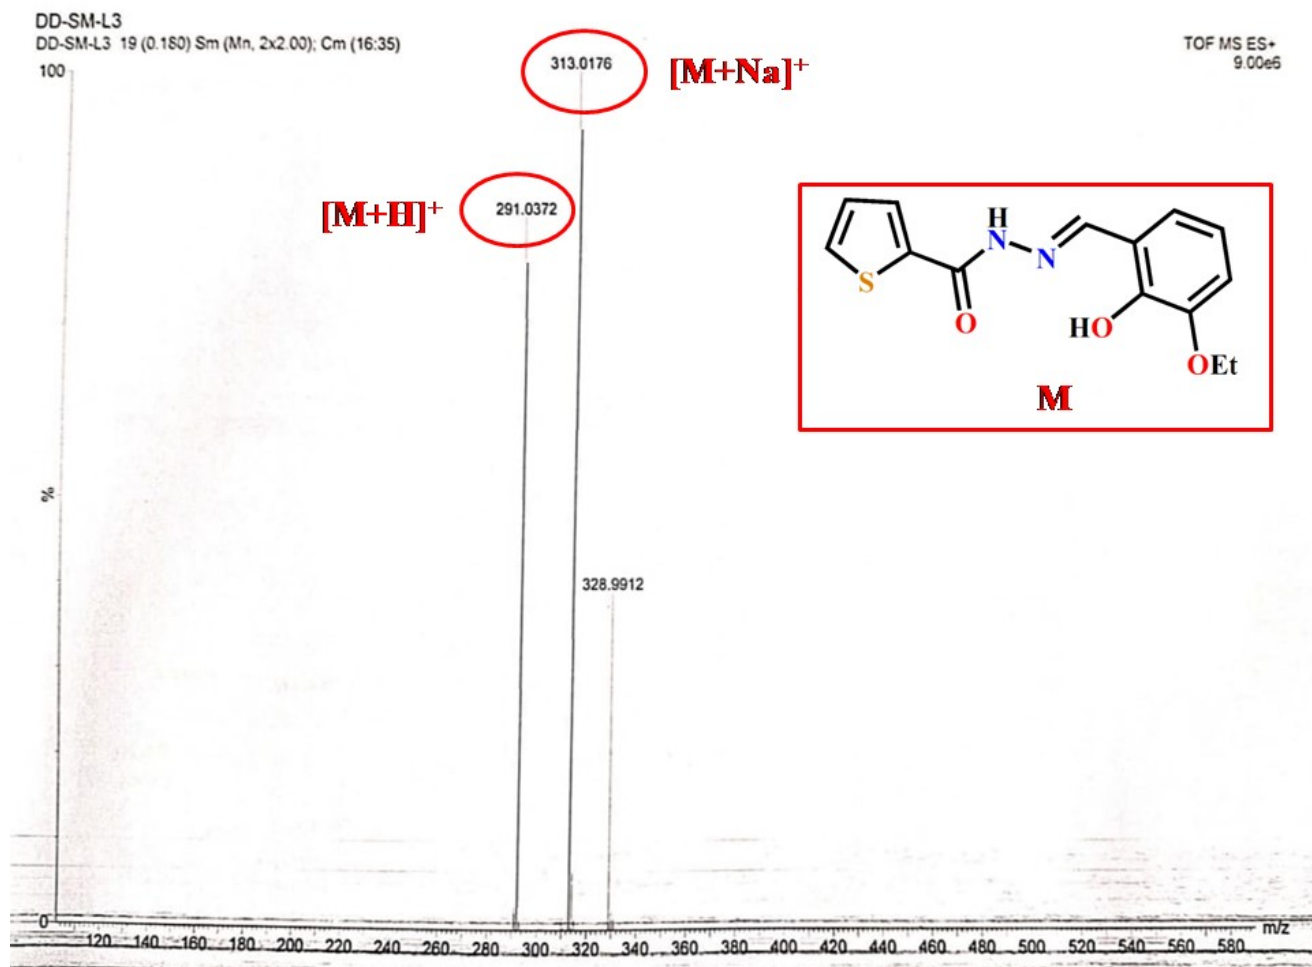

Figure S3a QTOF mass spectrum of L2

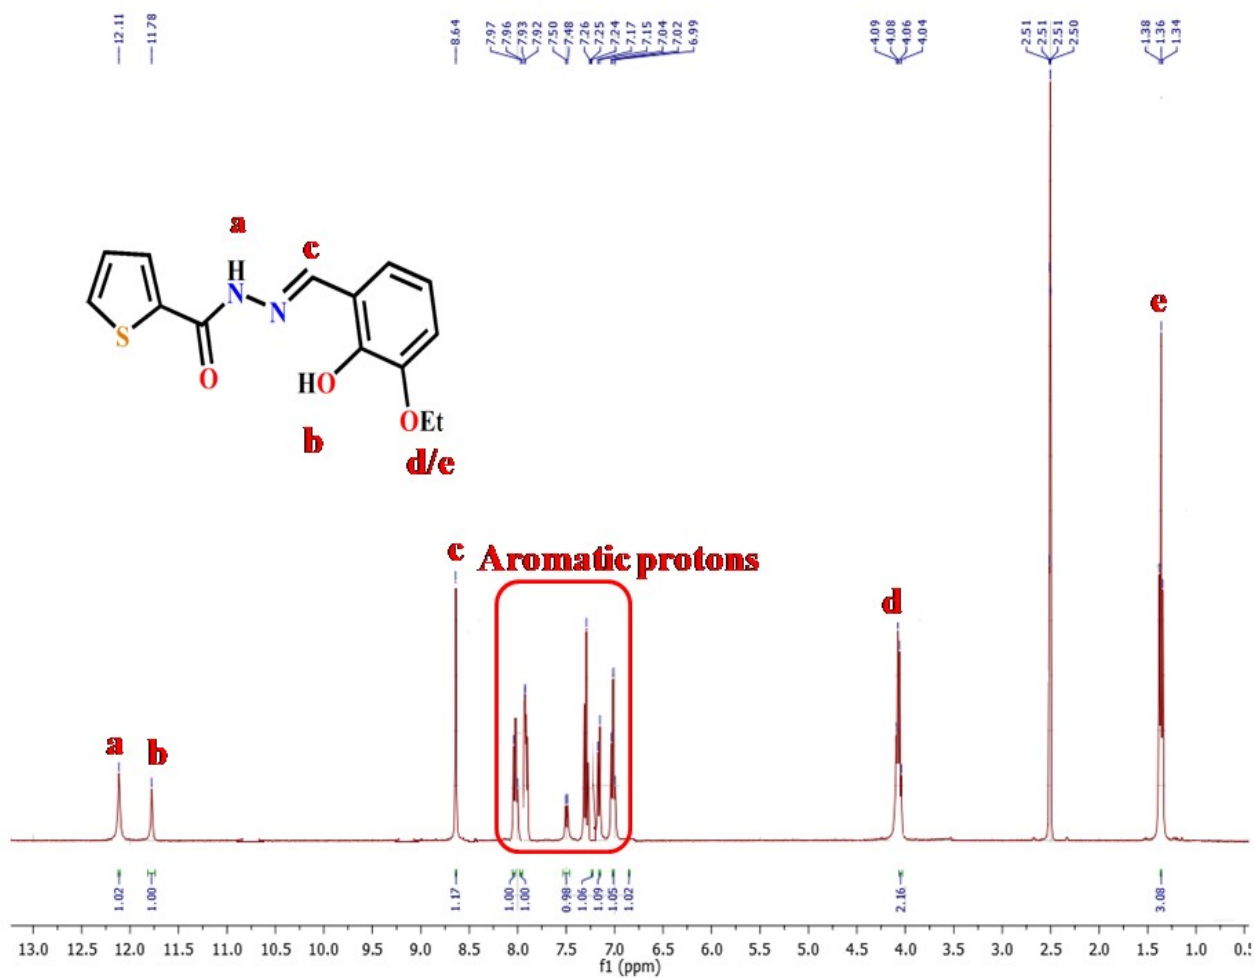

Figure S3b <sup>1</sup>H NMR spectrum of L2 in DMSO-*d*<sub>6</sub>

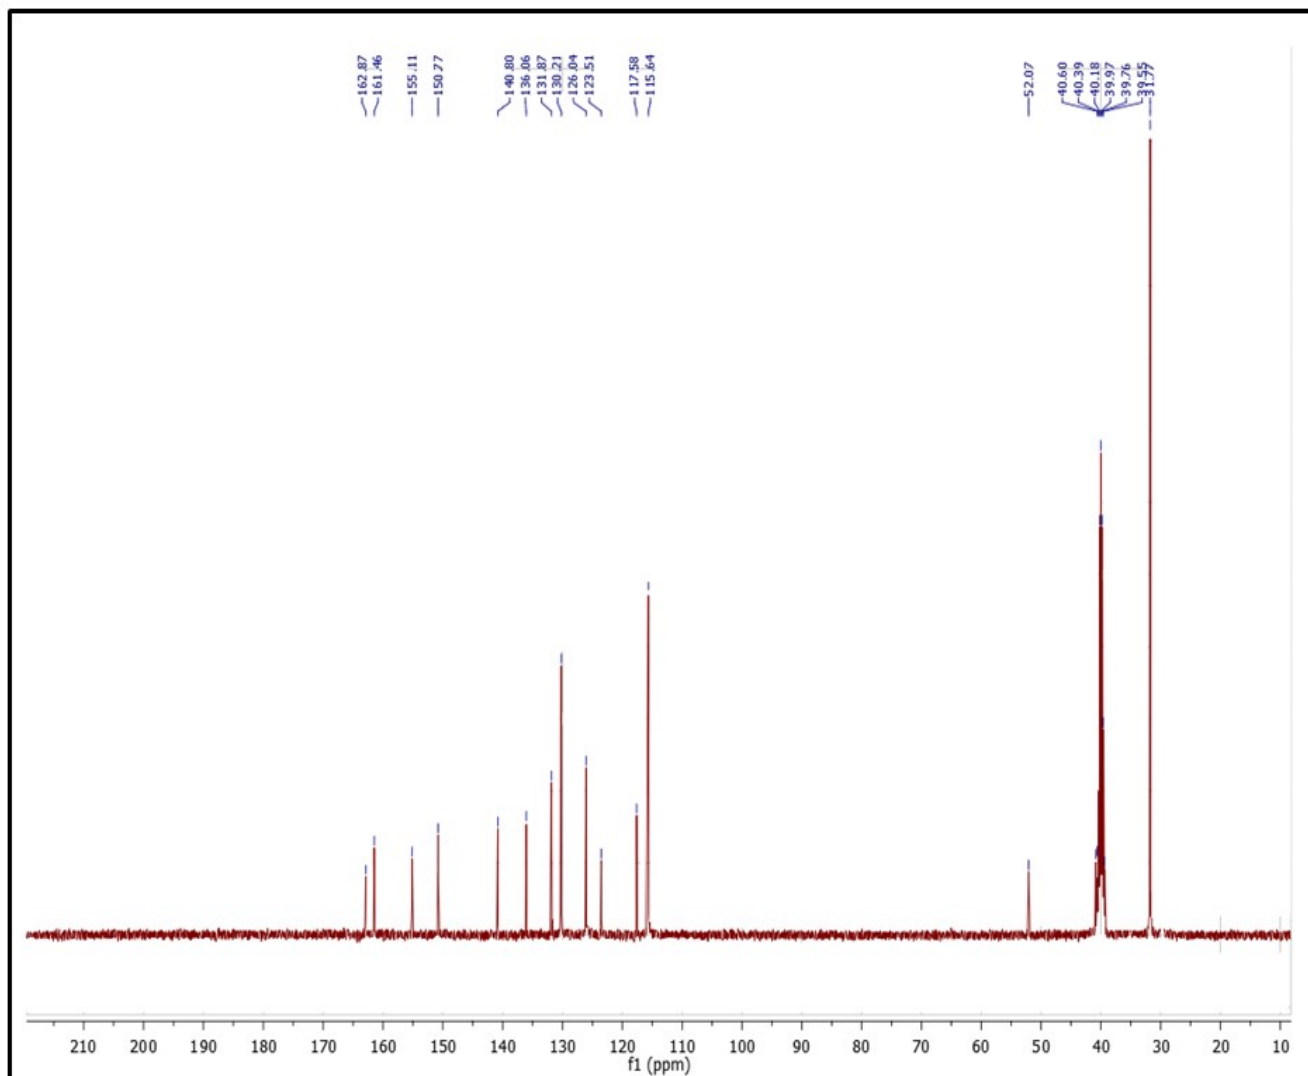

**Figure S3c**  $^{13}\text{C}$ NMR spectrum of **L2**

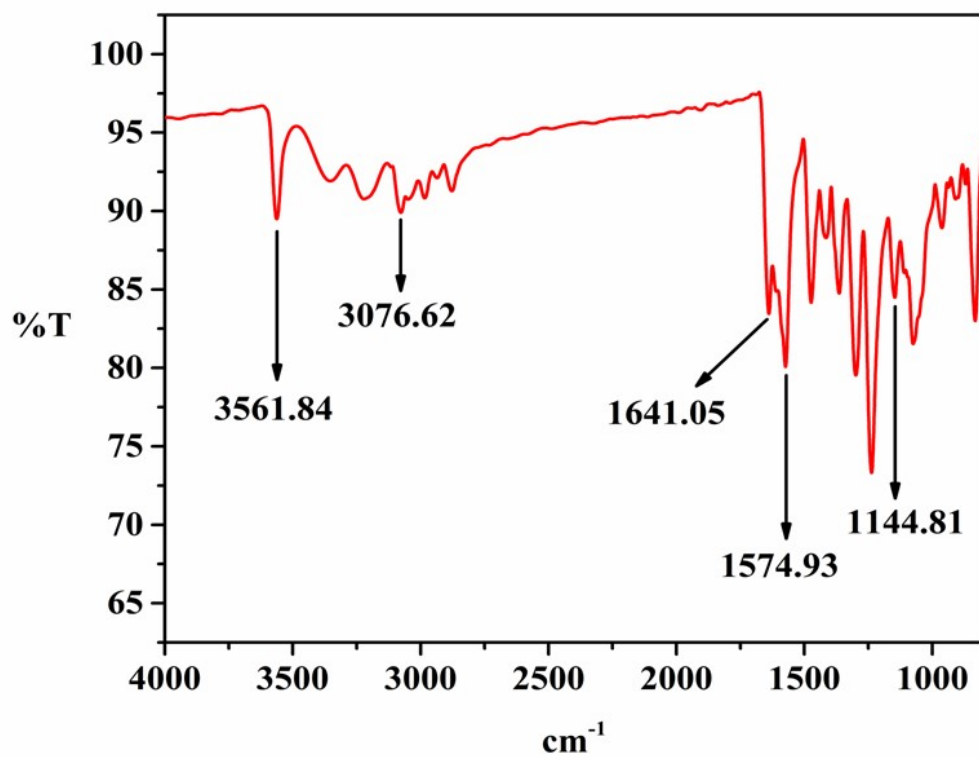

**Figure S3d** FTIR spectrum of L2

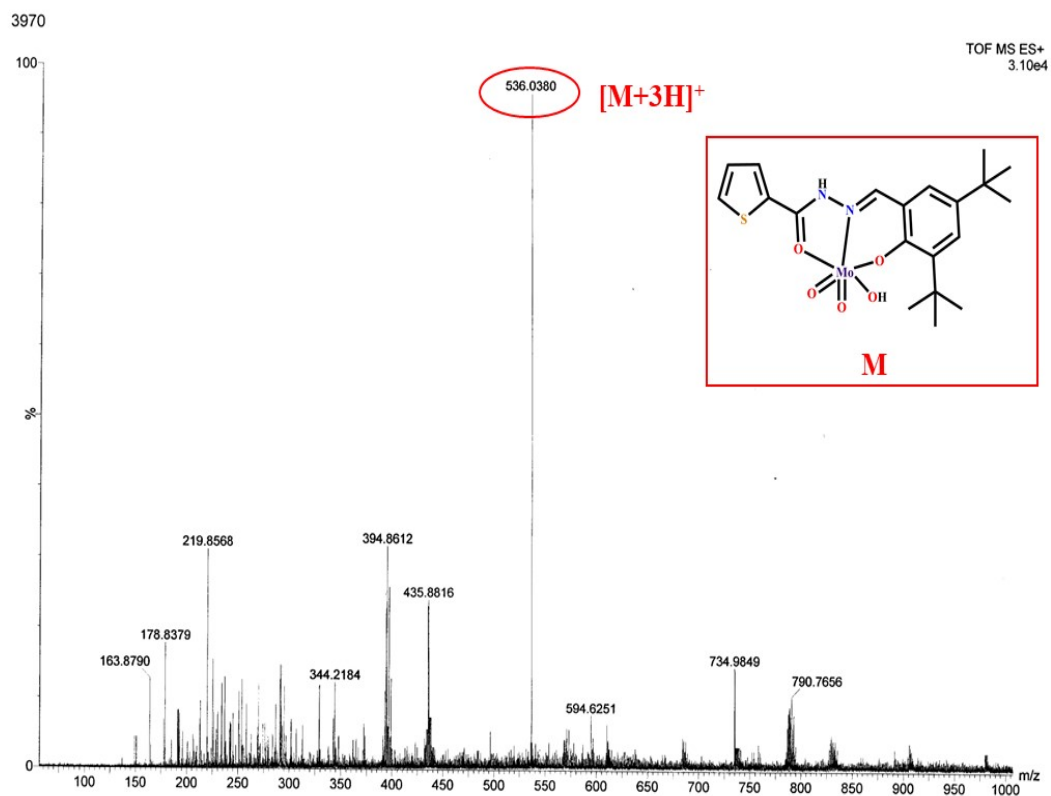

**Figure S4a** QTOF mass spectrum of **M1**

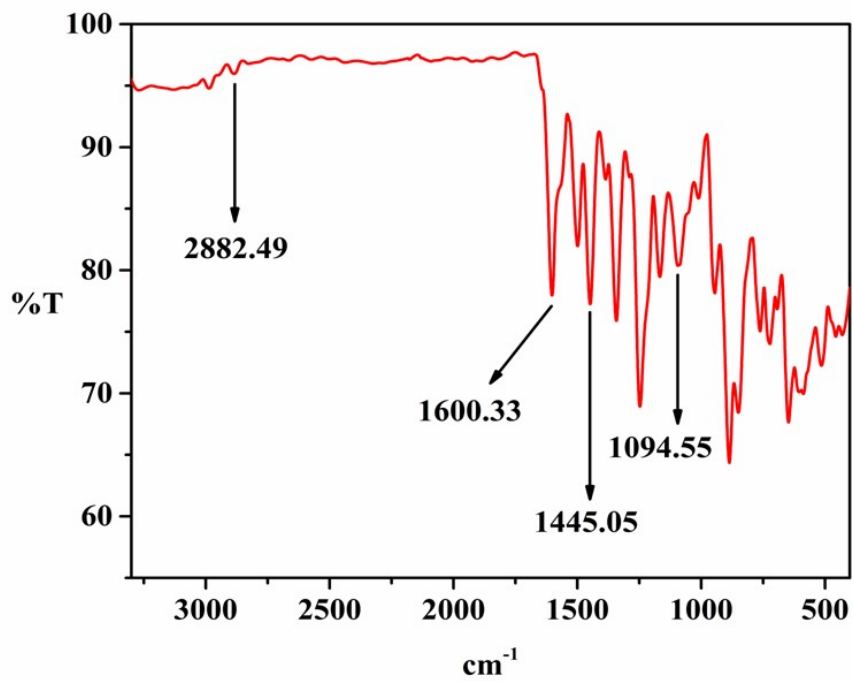

**Figure S4b** FTIR spectrum of **M1**

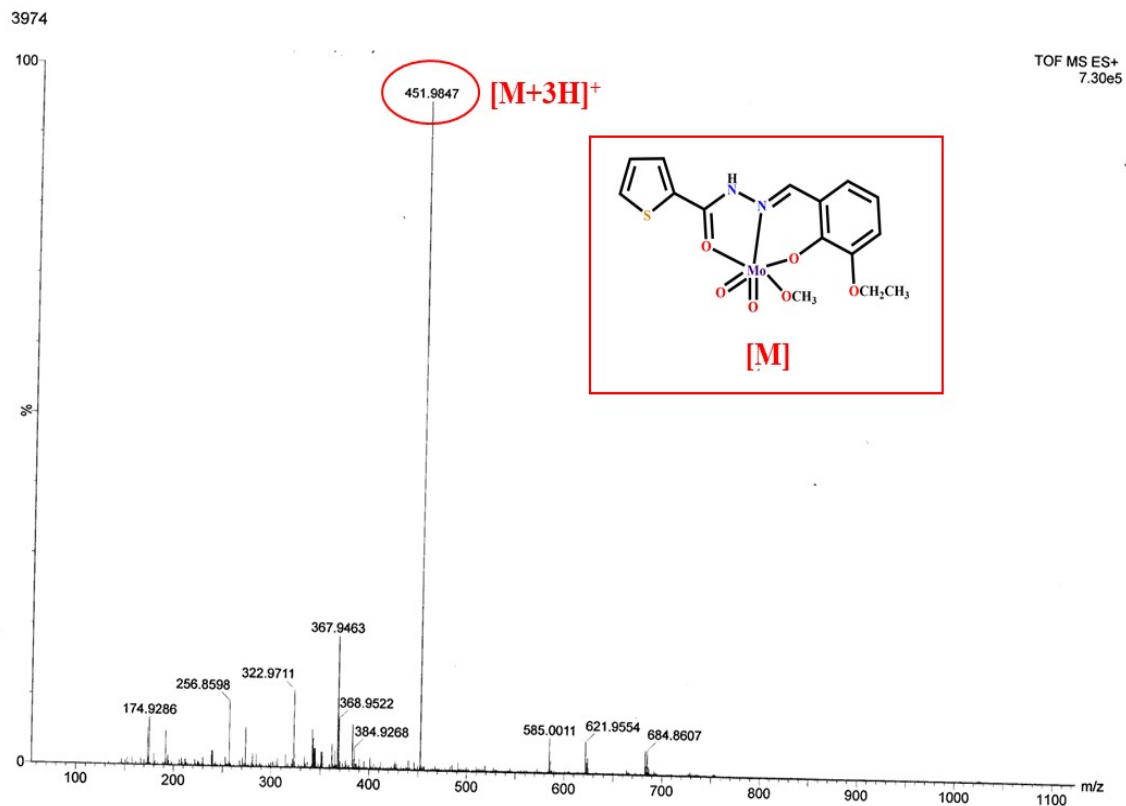

Figure S5a QTOF mass spectrum of M2

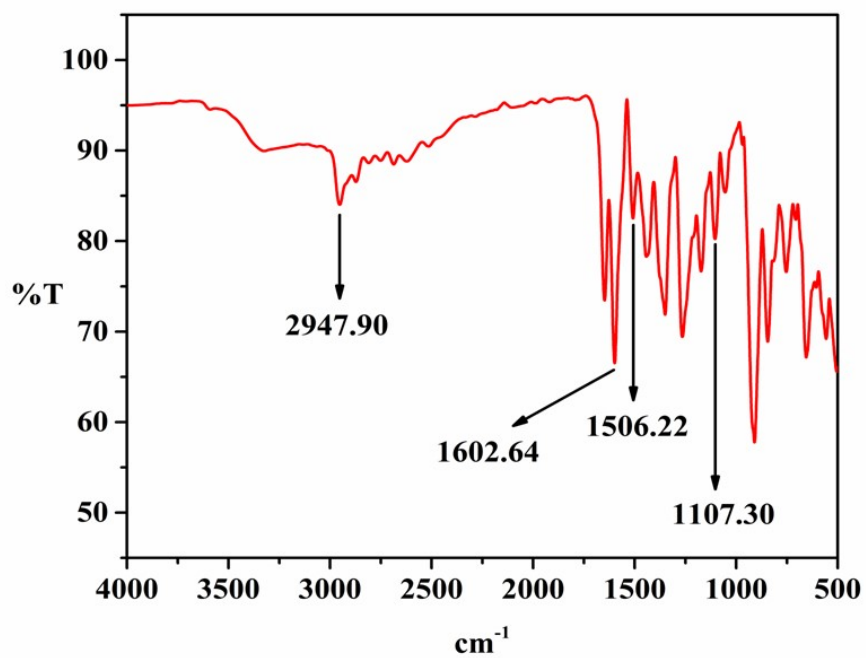

Figure S5b FTIR spectrum of M2

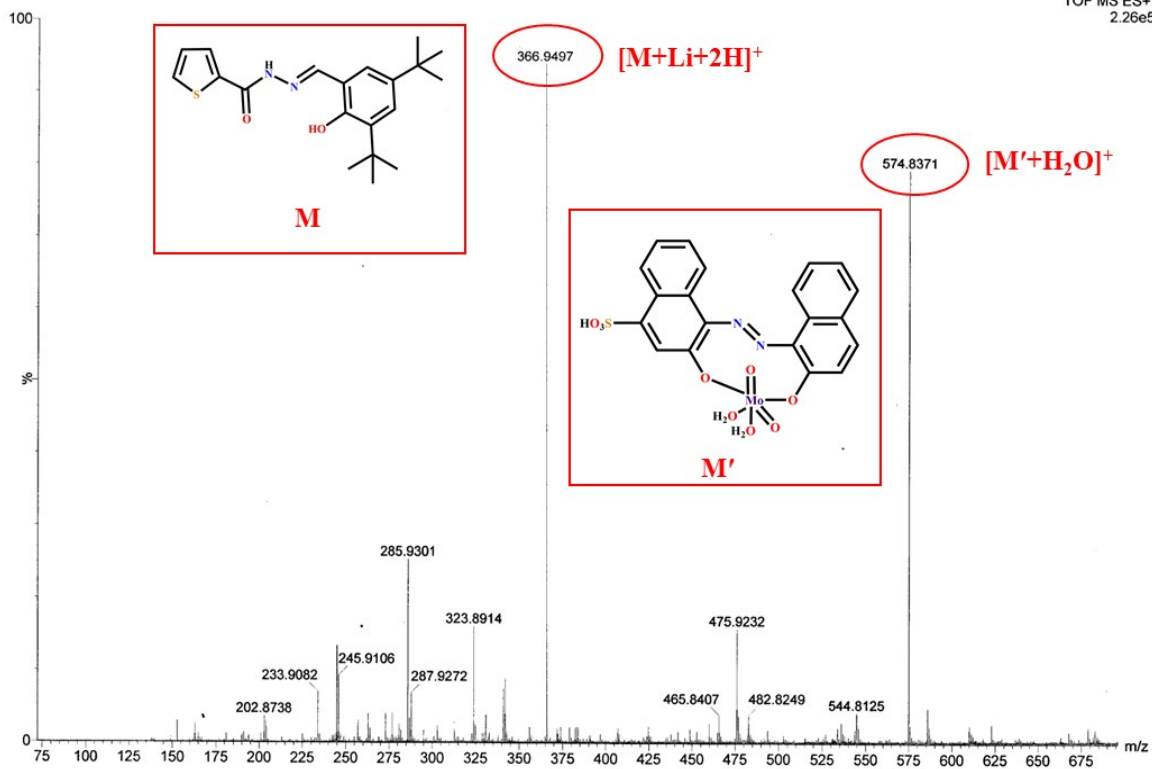

Figure S6a QTOF mass spectrum of C1

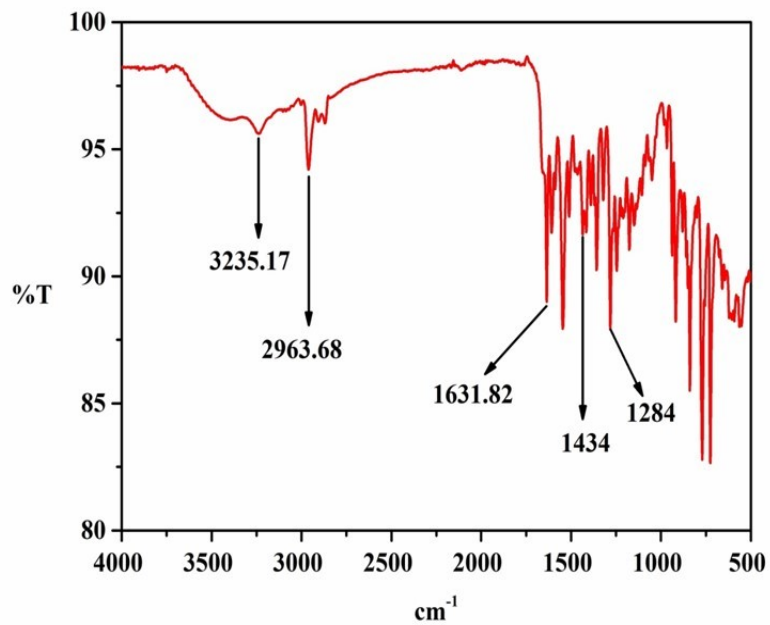

Figure S6b FTIR spectrum of C1

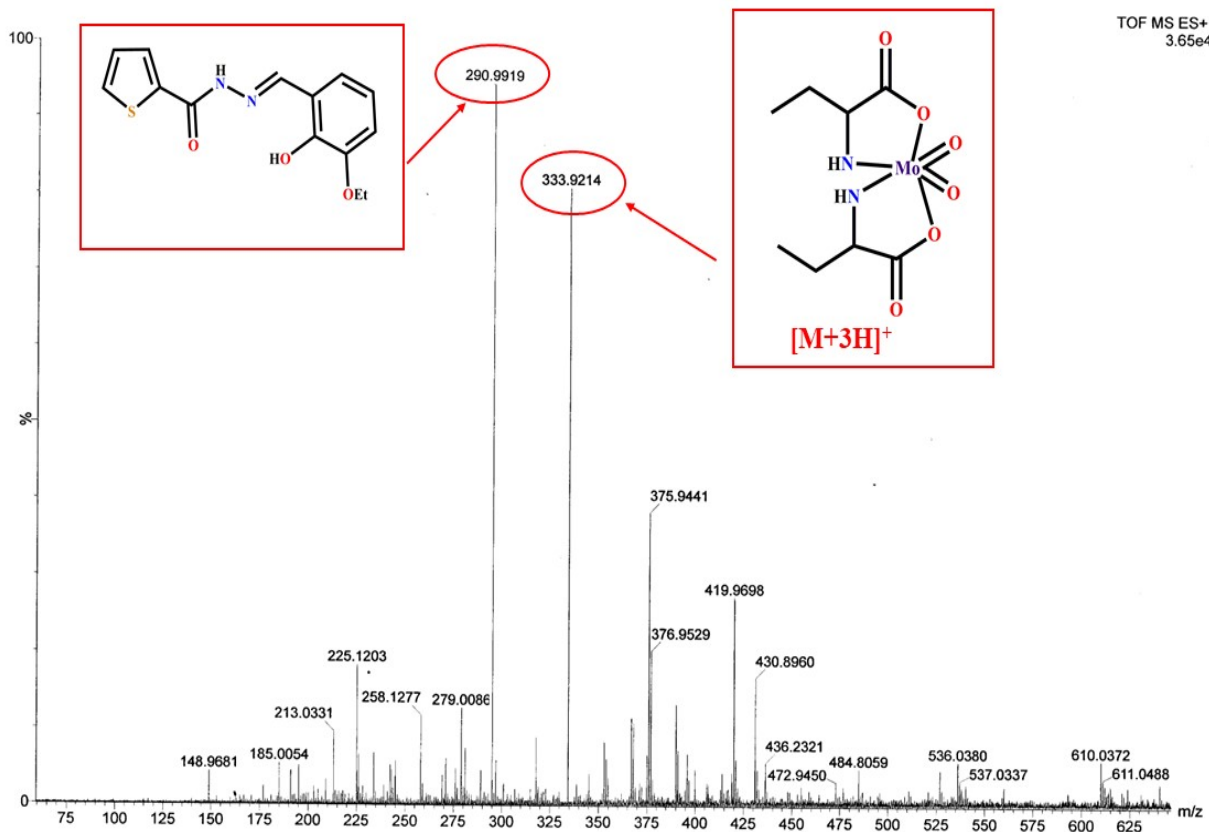

Figure S7a QTOF mass spectrum of A1

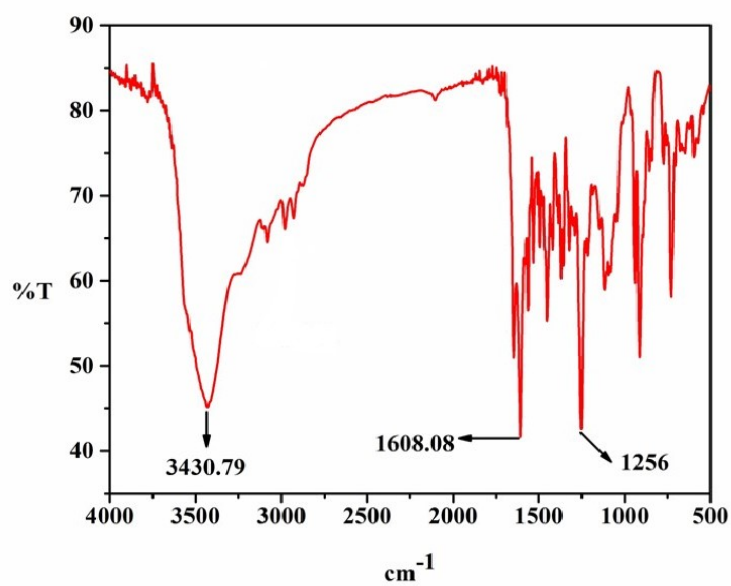

Figure S7b FTIR spectrum of A1

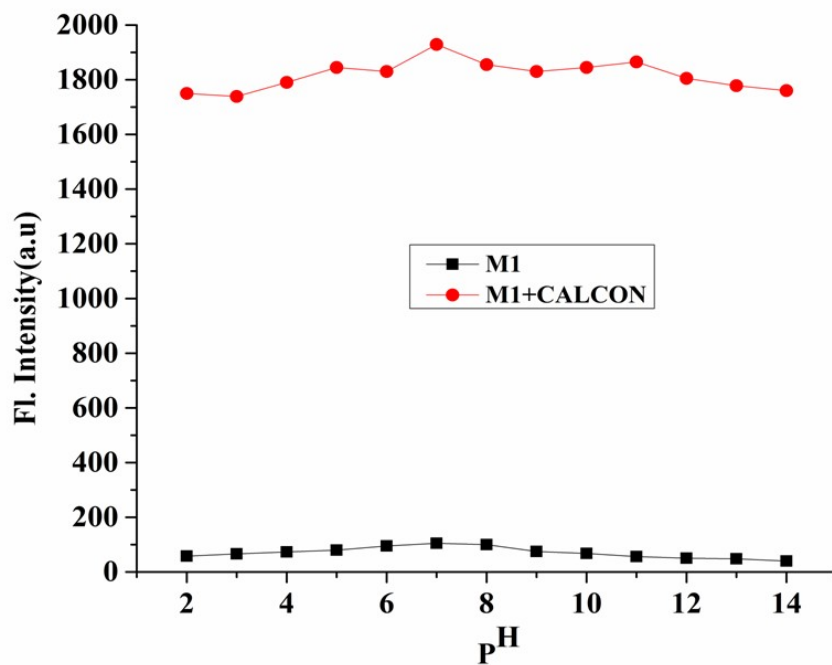

**Figure S8a** Effect of pH on the emission intensities of **M1** ( $\lambda_{\text{ex}} = 285 \text{ nm}$ ,  $\lambda_{\text{em}} = 484 \text{ nm}$ ) in presence and absence of calcon

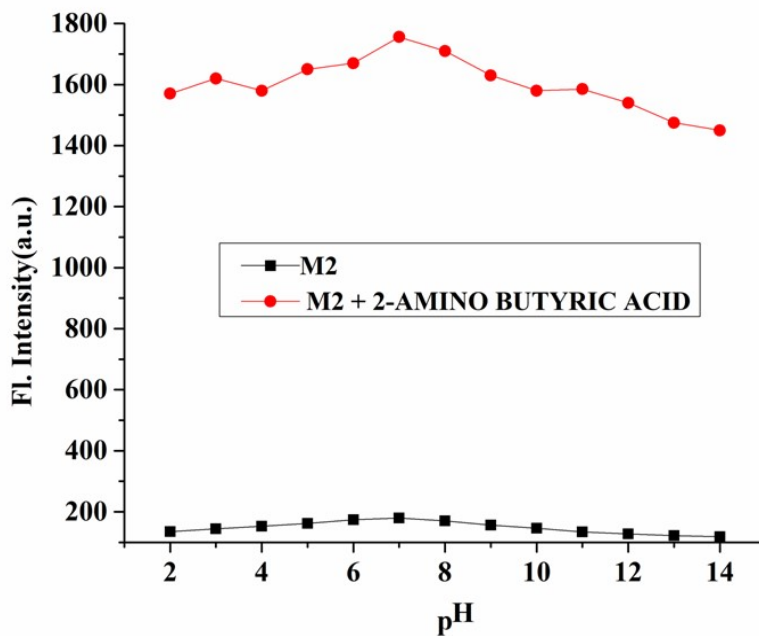

**Figure S8b** Effect of pH on the emission intensities of **M2** ( $\lambda_{\text{ex}} = 290 \text{ nm}$ ,  $\lambda_{\text{em}} = 489 \text{ nm}$ ) in presence and absence of 2-amino butyric acid

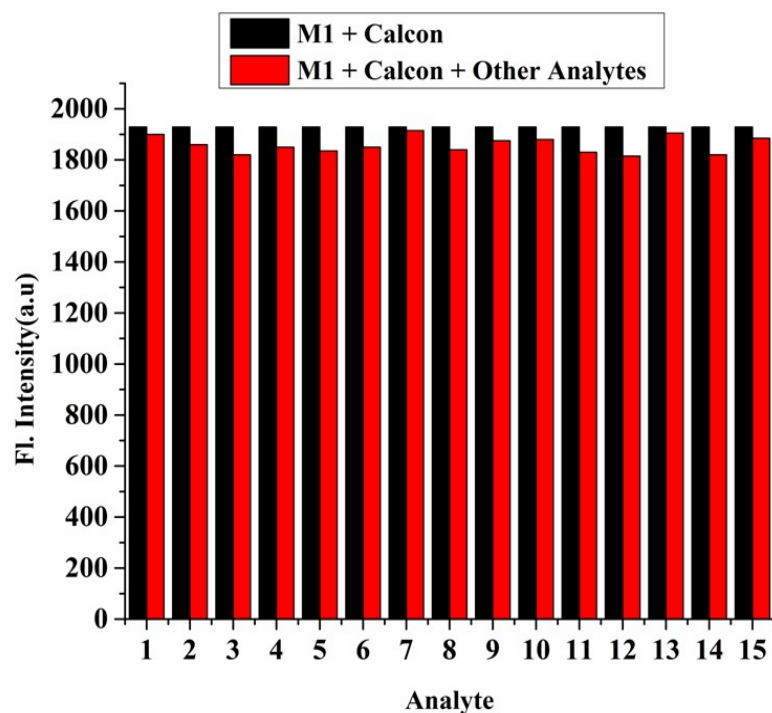

**Figure S9a** Plot for interference from common indicators during fluorescence recognition of calcon using **M1** ( $\lambda_{\text{ex}} = 285 \text{ nm}$ ,  $\lambda_{\text{em}} = 484 \text{ nm}$ ). 1; murexide, 2; phenolphthalein, 3; EBT, 4; methyl red, 5; methyl orange, 6; thymol blue, 7; bromocresol green, 8; methyl violet, 9; alizarin yellow R, 10; bromothymol blue, 11; anthraquinone, 12; methylene blue, 13; malachite green, 14; picric acid, 15; rhodamin B.

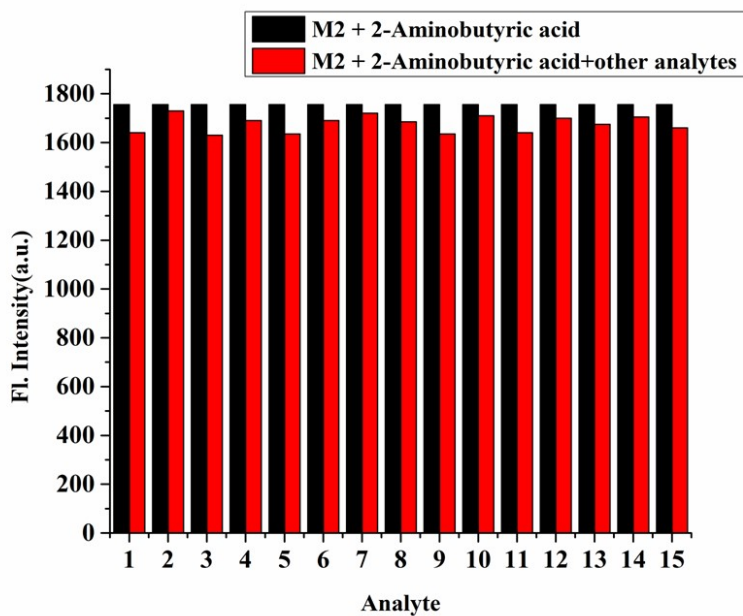

**Figure S9b** Plot for interference from common bio-molecules during fluorescence recognition of 2-aminobutyric acid using **M2** ( $\lambda_{\text{ex}} = 290 \text{ nm}$ ,  $\lambda_{\text{em}} = 489 \text{ nm}$ ). 1; methionine, 2; arginine, 3; cysteine, 4; proline, 5; lysine, 6; tryptophan, 7; phenylalanine, 8; glycine, 9; aspartic acid, 10; creatinine, 11; Alanine, 12; superoxide dismutase, 13; bisphenol, 14; glutathione, 15; cytochrome C

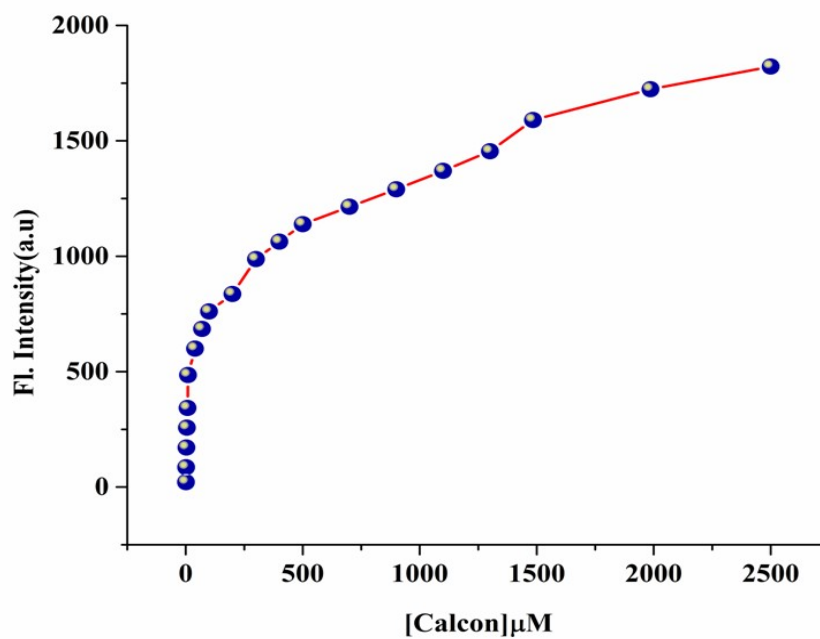

**Figure S10a** Plot of emission intensities of **M1** (20  $\mu\text{M}$ ,  $\lambda_{\text{ex}} = 285 \text{ nm}$ ,  $\lambda_{\text{em}} = 484 \text{ nm}$ ) as a function of externally added calcon (1.0-2500  $\mu\text{M}$ )

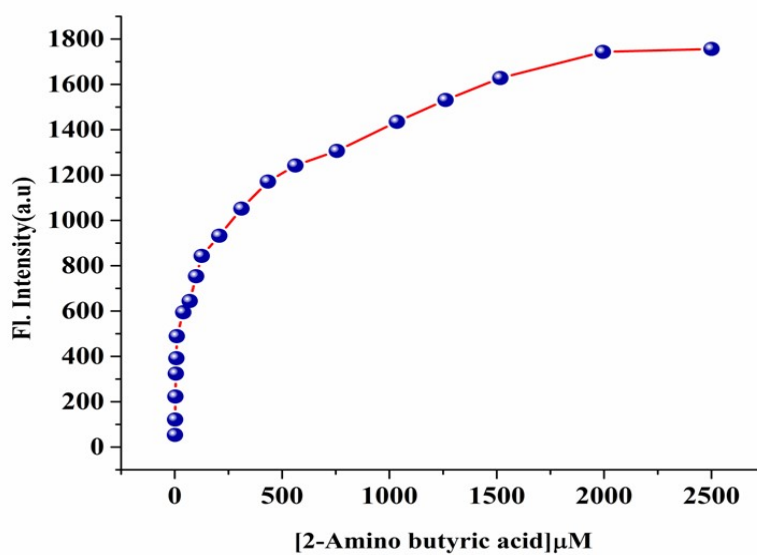

**Figure S10b** Plot of emission intensities of **M2** (20  $\mu\text{M}$ ,  $\lambda_{\text{ex}} = 290 \text{ nm}$ ,  $\lambda_{\text{em}} = 489 \text{ nm}$ ) as a function of externally added 2-aminobutyric acid (1.0-2500  $\mu\text{M}$ )

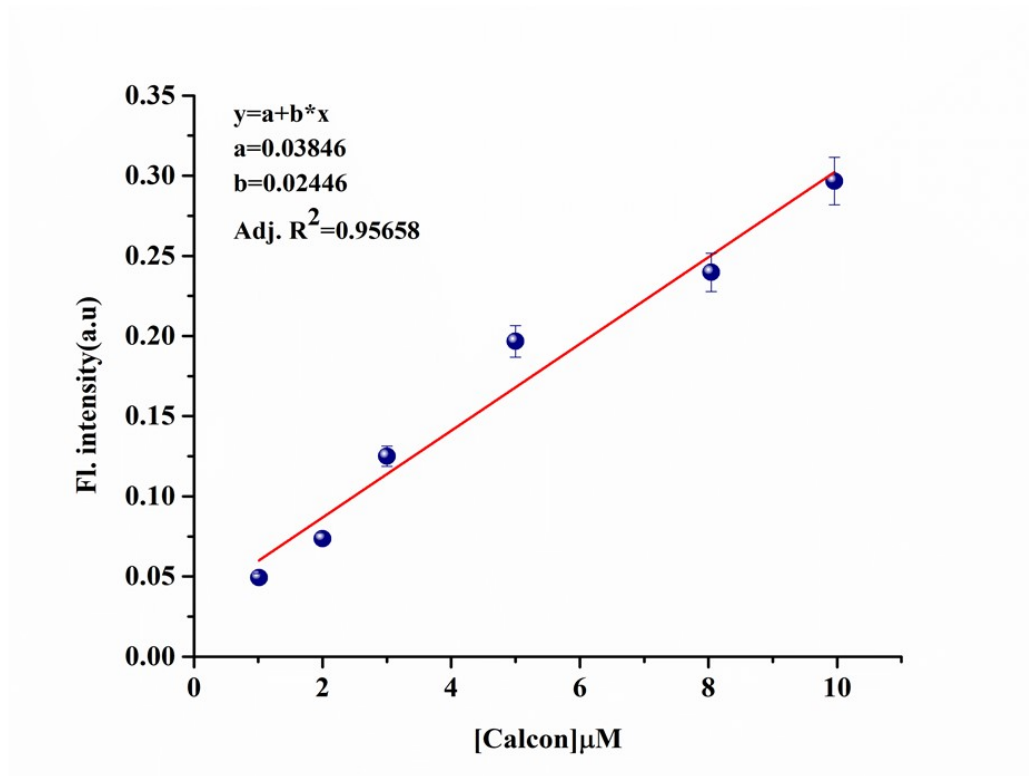

**Figure S11a** Determination of the detection limit of calcon ( $\lambda_{\text{ex}} = 285 \text{ nm}$ ,  $\lambda_{\text{em}} = 484 \text{ nm}$ ) using **M1** ( $20 \mu\text{M}$ )

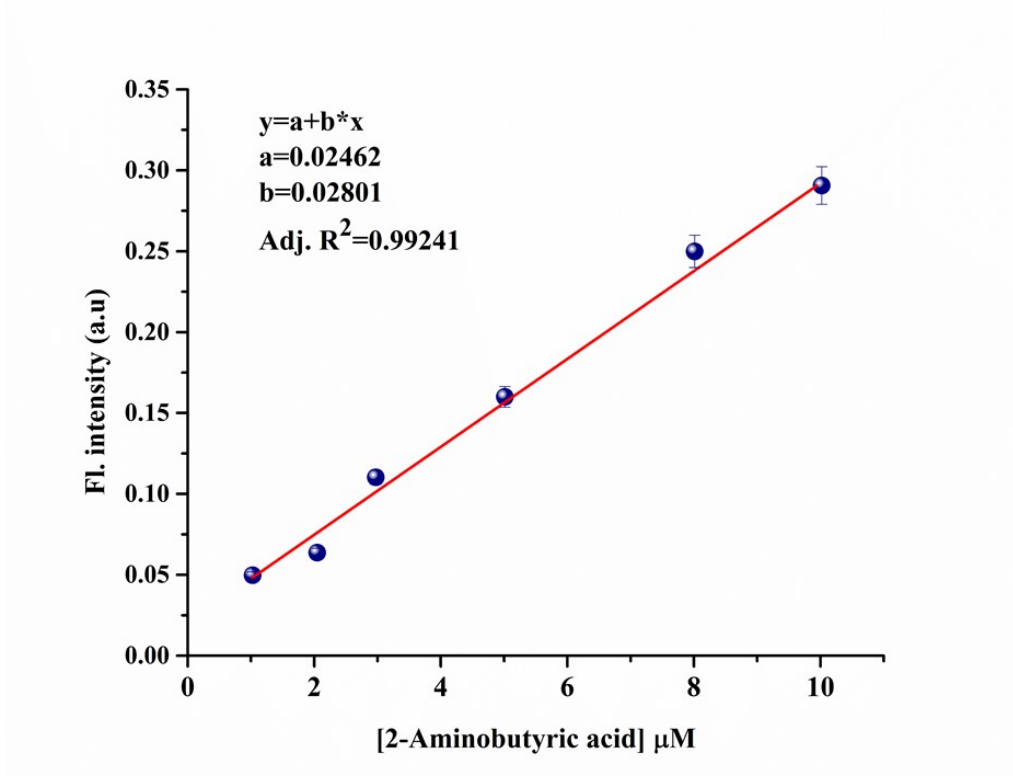

**Figure S11b** Determination of the detection limit based of 2-aminobutyric acid ( $\lambda_{\text{ex}} = 290 \text{ nm}$ ,  $\lambda_{\text{em}} = 489 \text{ nm}$ ) using **M2** ( $20 \mu\text{M}$ ).

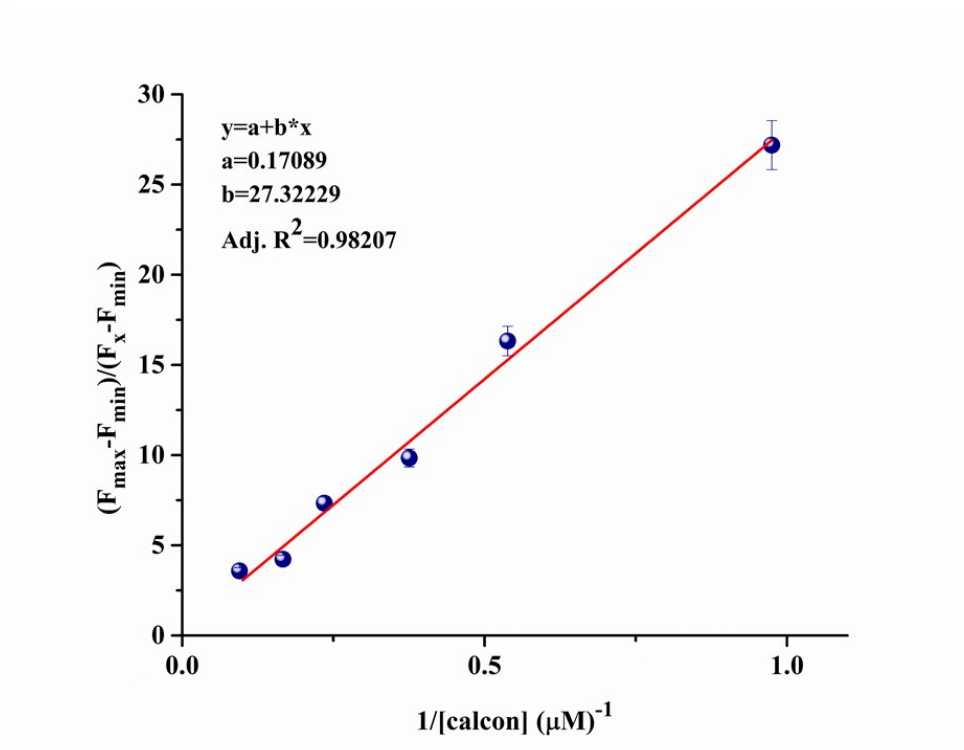

**Figure S12a** Benesi–Hildebrand plot for determination of displacement binding constant for calcon using **M1** (liner portion only) ( $\lambda_{\text{ex}} = 285 \text{ nm}$ ,  $\lambda_{\text{em}} = 484 \text{ nm}$ )

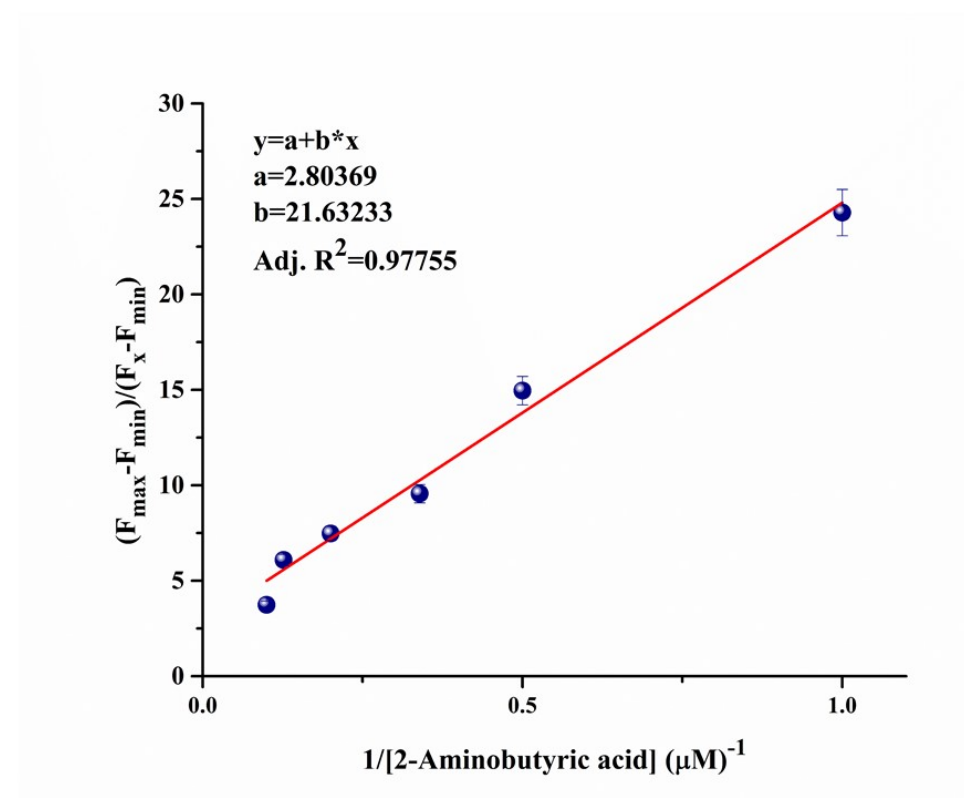

**Figure S12b** Benesi–Hildebrand plot for determination of displacement binding constant for 2-aminobutyric acid using **M2** (liner portion only) ( $\lambda_{\text{ex}} = 290 \text{ nm}$ ,  $\lambda_{\text{em}} = 489 \text{ nm}$ )

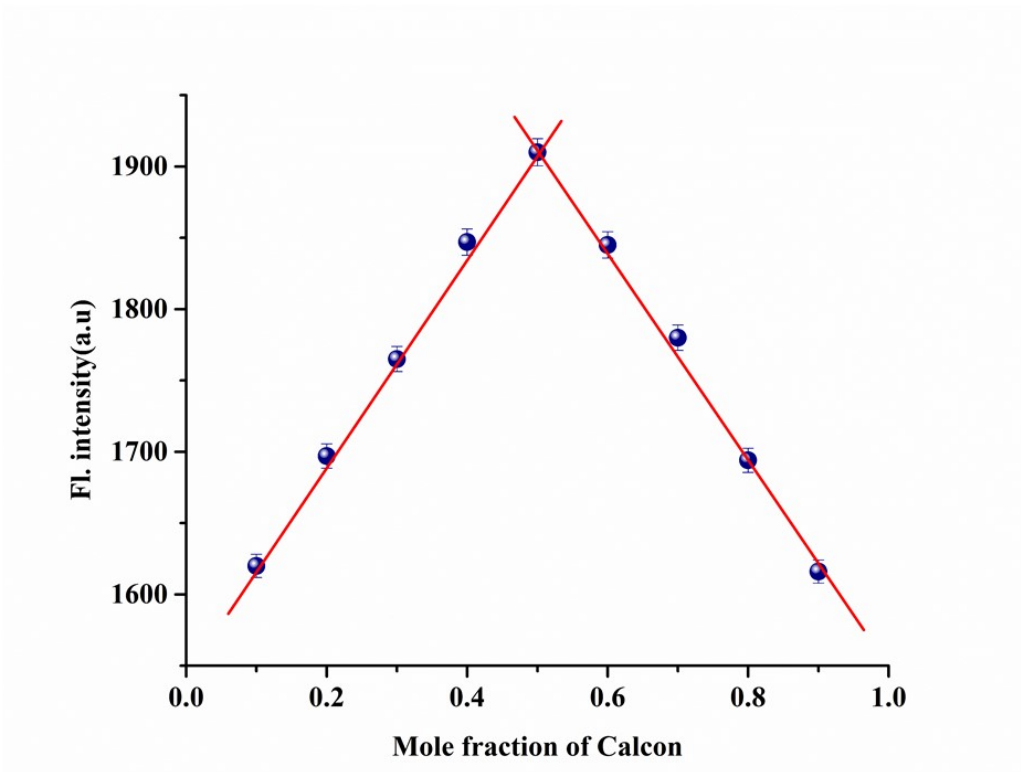

**Figure S13a** Job's plot for stoichiometry determination of **C1** ( $\lambda_{\text{ex}} = 285 \text{ nm}$   $\lambda_{\text{em}} = 484 \text{ nm}$ )

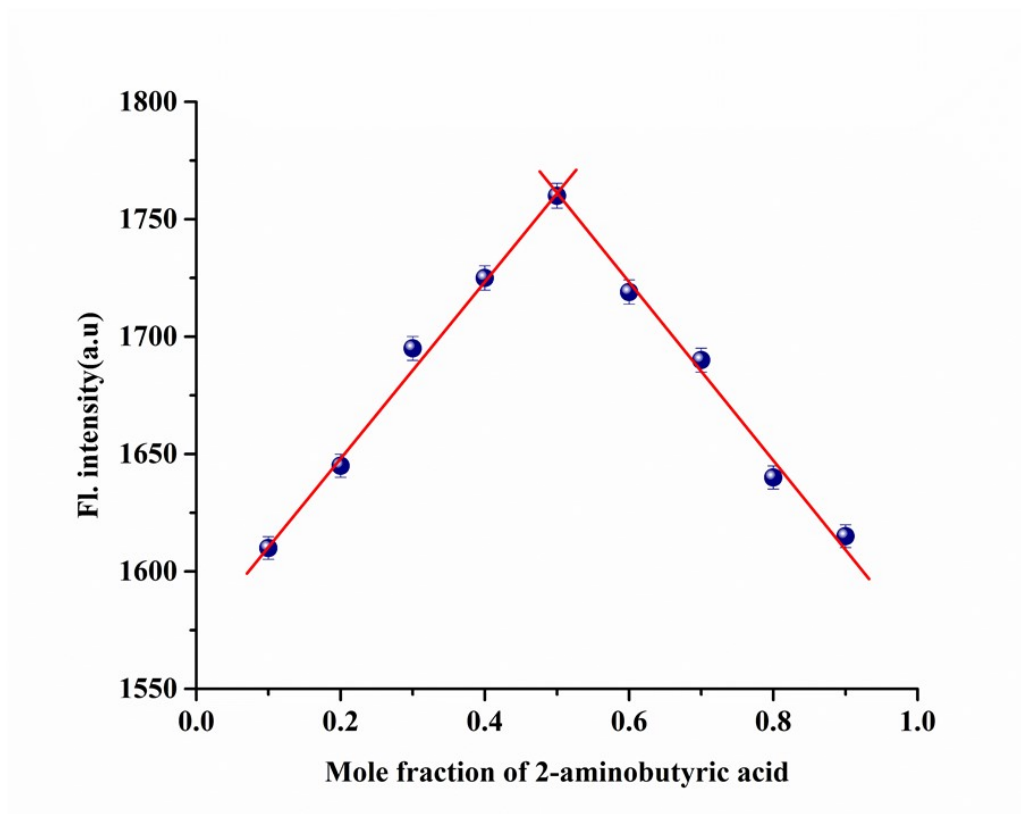

**Figure S13b** Job's plot for stoichiometry determination of **A1** ( $\lambda_{\text{ex}} = 290 \text{ nm}$ ,  $\lambda_{\text{em}} = 489 \text{ nm}$ )

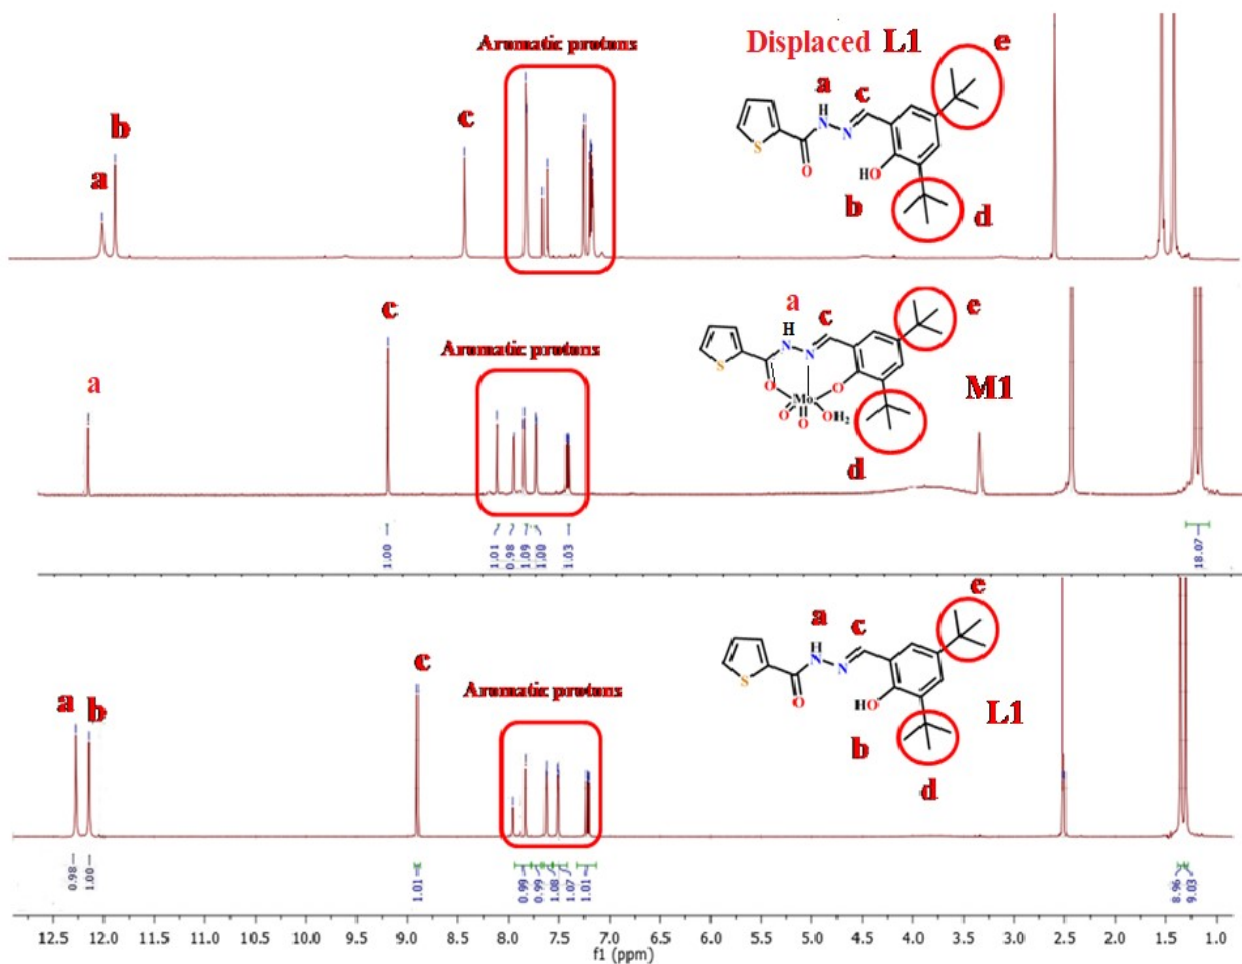

**Figure S14a** Changes in the  $^1\text{H}$ NMR spectra of **L1** and **M1** upon interaction with Mo(VI) and calcon respectively

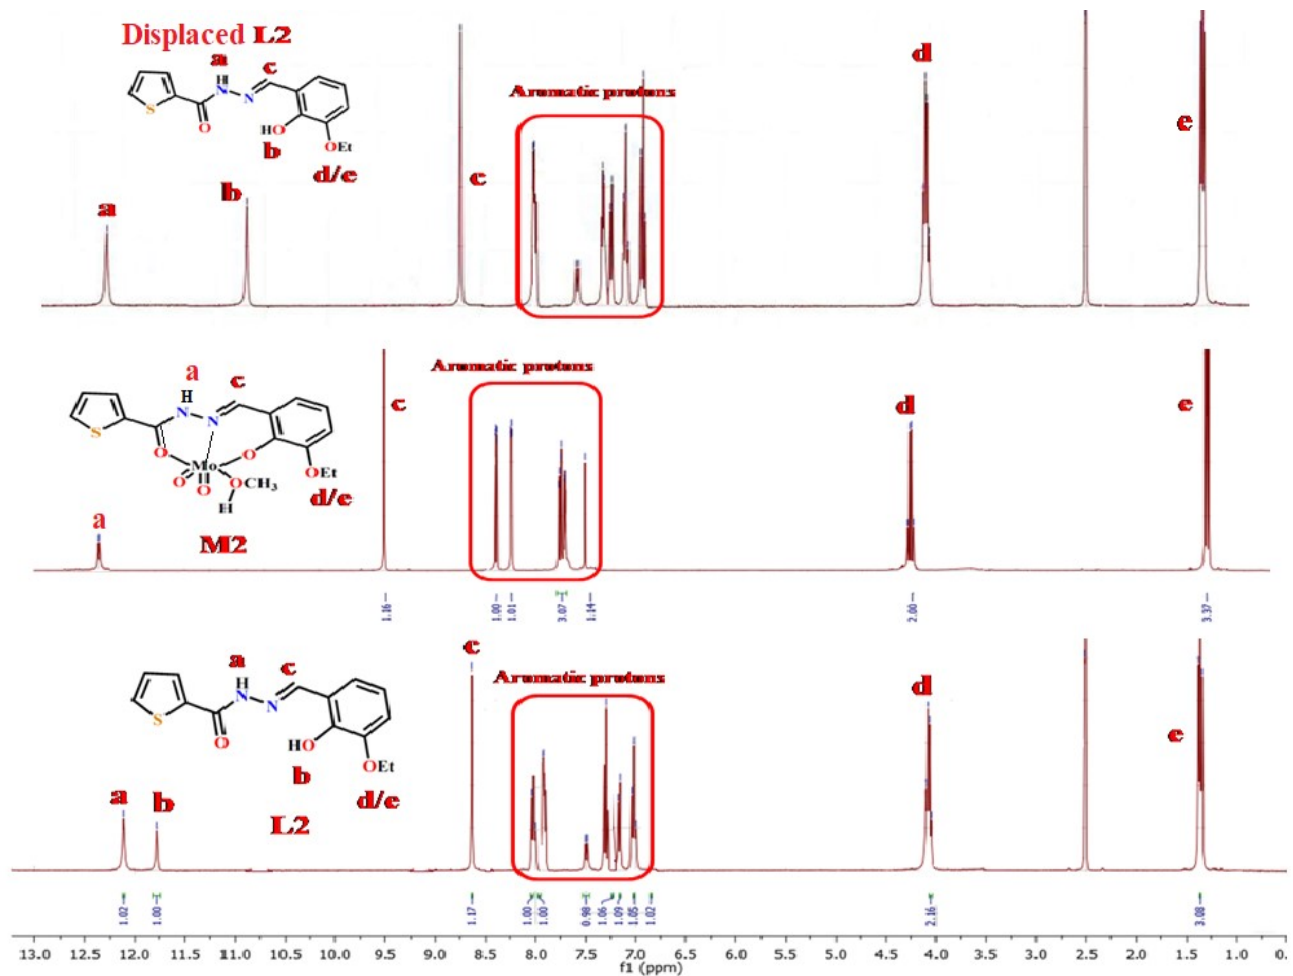

**Figure S14b** Changes in the  $^1\text{H}$ NMR spectra of L2 and M2 upon interaction with Mo(VI) and 2-aminobutyric acid respectively

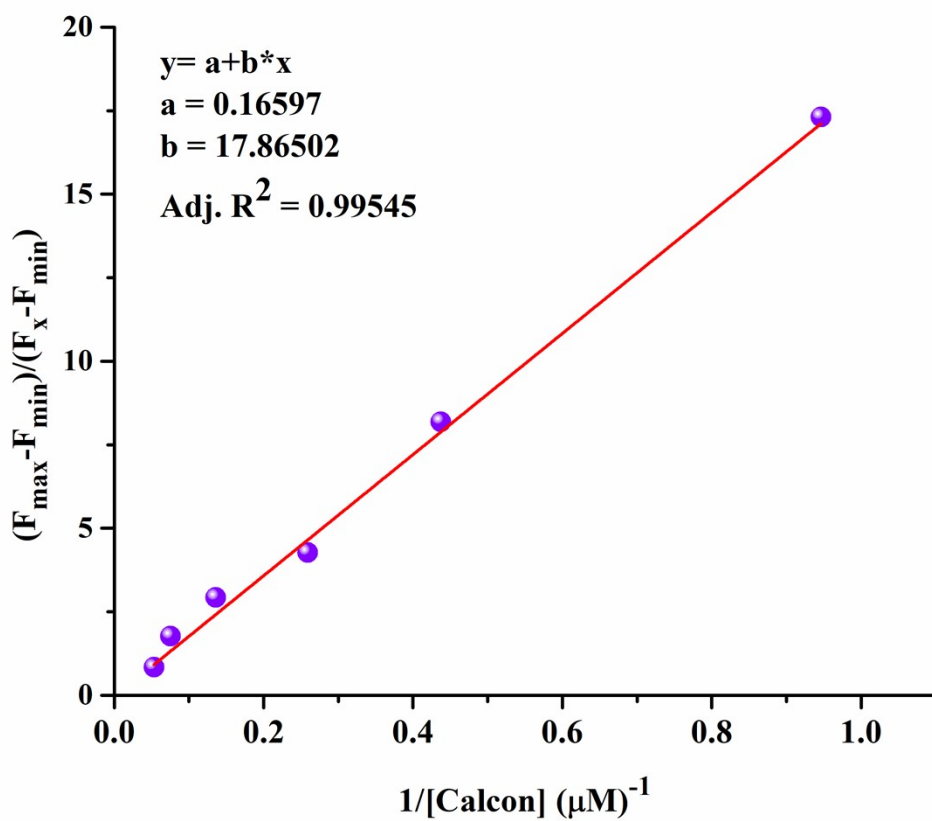

**Figure S15a** Benesi–Hildebrand plot for determination of binding constant for calcon and Mo(VI) ion in presence of L1.

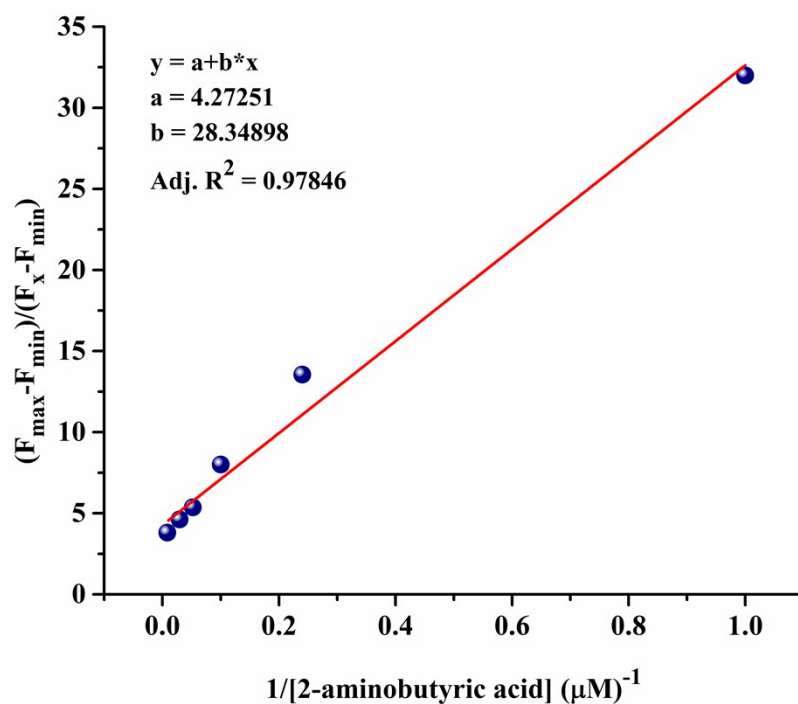

**Figure S15b** Benesi–Hildebrand plot for determination of binding constant for 2-aminobutyric acid with Mo(VI) ion in presence of L2

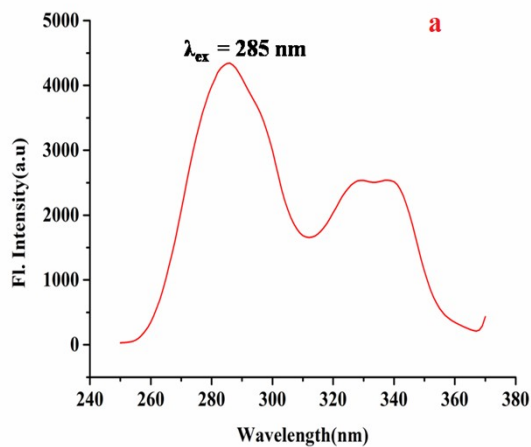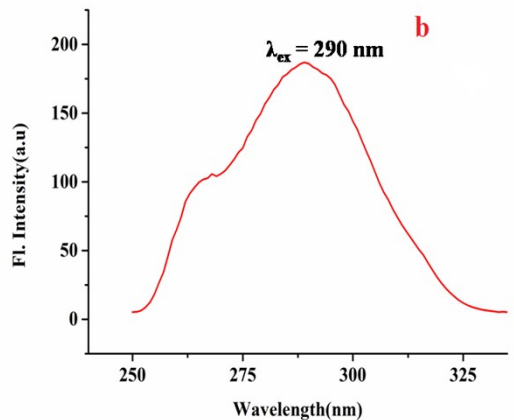

**Figure S16a** Excitation spectra of **C1** (a) and **A1** (b); media and pH mentioned *supra*

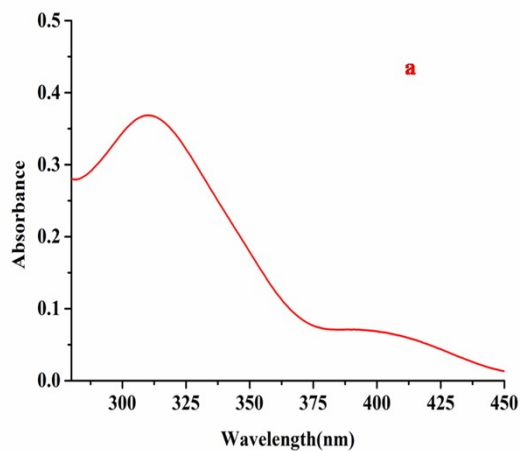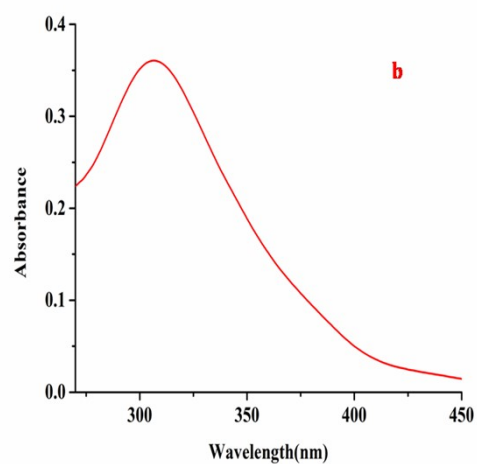

**Figure S16b** Absorption spectra of **C1** (a) and **A1** (b); media and pH mentioned *supra*

**Table S1** Crystal data and structure refinement for **M1** and **M2**

| Crystal parameters | <b>M1</b>                                                         | <b>M2</b>                                                          |
|--------------------|-------------------------------------------------------------------|--------------------------------------------------------------------|
| CCDC               | <b>2365489</b>                                                    | <b>2365810</b>                                                     |
| Empirical formula  | C <sub>20</sub> H <sub>25</sub> MoN <sub>2</sub> O <sub>7</sub> S | C <sub>15</sub> H <sub>16</sub> Mo N <sub>2</sub> O <sub>6</sub> S |
| Formula weight     | 533.42                                                            | 448.30                                                             |
| Crystal system     | Triclinic                                                         | Triclinic                                                          |
| Space group        | P -1                                                              | P -1                                                               |
| Hall group         | -P 1                                                              | -P 1                                                               |
| Temperature        | 296 K                                                             | 296 K                                                              |

|                                     |               |               |
|-------------------------------------|---------------|---------------|
| Wavelength                          | 0.71073       | 0.71073       |
| $a/\text{\AA}$                      | 9.9045(9)     | 8.2019(8)     |
| $b/\text{\AA}$                      | 10.4697(8)    | 8.5271(9)     |
| $c/\text{\AA}$                      | 14.7351(12)   | 12.8130(13)   |
| $\alpha/^\circ$                     | 72.154(5)     | 93.903(5)     |
| $\beta/^\circ$                      | 85.084(5)     | 92.557(5)     |
| $\gamma/^\circ$                     | 65.666(5)     | 96.706(5)     |
| Volume/ $\text{\AA}^3$              | 1323.8(2)     | 886.68(16)    |
| $Z$                                 | 2             | 2             |
| $\rho_{\text{calc}} \text{ g/cm}^3$ | 1.338         | 1.679         |
| $\mu/\text{mm}^{-1}$                | 0.611         | 0.891         |
| F(000)                              | 546.0         | 452.0         |
| F(000')                             | 543.04        | 448.99        |
| $\Theta_{\text{max}}$               | 28.530        | 28.487        |
| Index ranges (h,k,lmax)             | 13,14,19      | 11,11,17      |
| Reflections collected (R)           | 0.0931 (5157) | 0.0815 (3936) |
| $wR_2$ (Reflection)                 | 0.2867 (6571) | 0.2638 (4397) |
| S                                   | 2.020         | 2.235         |
| Npar                                | 286           | 228           |
| Data completeness                   | 0.977         | 0.982         |

**Table S2a** Selected bond lengths and angles of **M1**

| Atoms | Bond length | Atoms     | Bond angle |
|-------|-------------|-----------|------------|
| Mo O3 | 1.678(5)    | O3 Mo1 O2 | 105.9(3)   |
| Mo O2 | 1.705(5)    | O3 Mo1 O4 | 99.3(3)    |
| Mo O4 | 1.913(4)    | O2 Mo1 O4 | 102.9(2)   |
| Mo O5 | 2.028(4)    | O3 Mo1 O5 | 94.8(2)    |
| Mo O1 | 2.300(4)    | O2 Mo1 O5 | 98.6(2)    |
| Mo N6 | 2.254(4)    | O4 Mo1 O5 | 149.88(17) |
| S2 CP | 1.693(8)    | O3 Mo1 N6 | 95.9(2)    |
| S2 CM | 1.720(6)    | O2 Mo1 N6 | 157.0(2)   |
| O4 CB | 1.343(7)    | O4 Mo1 N6 | 80.33(16)  |
| O5 CH | 1.310(7)    | O5 Mo0 N6 | 71.82(17)  |
| N6 CG | 1.288(7)    | O3 Mo1 O1 | 170.2(2)   |
| N6 N8 | 1.396(6)    | O2 Mo1 O1 | 81.8(2)    |

|       |           |           |           |
|-------|-----------|-----------|-----------|
| N8 CH | 1.300(7)  | O4 Mo1 O1 | 84.44(17) |
| CA CB | 1.413(7)  | O5 Mo1 O1 | 77.89(17) |
| CA CE | 1.415(8)  | N6 Mo1 O1 | 75.74(16) |
| CA CG | 1.447(7)  | CP S2 CM  | 92.2(3)   |
| CB CD | 1.417(8)  | CB O4 Mo1 | 135.6(4)  |
| CC CE | 1.363(8)  | CH O5 Mo1 | 119.5(4)  |
| CC CF | 1.429(8)  | CG N6 N8  | 117.4(4)  |
| CC CL | 1.537(8)  | CG N6 Mo1 | 127.9(4)  |
| CD CF | 1.376(9)  | N8 N6 Mo1 | 114.7(3)  |
| CD CK | 1.535(8)  | CH N8 N6  | 110.1(4)  |
| CH CM | 1.438(8)  | CB CA CE  | 119.4(5)  |
| CJ CO | 1.393(9)  | CB CA CG  | 122.8(5)  |
| CJ CM | 1.431(8)  | CE CA CG  | 117.8(5)  |
| CK CR | 1.507(10) | O4 CB CD  | 119.3(5)  |
| CK CV | 1.532(12) | O4 CB CA  | 120.5(5)  |
| CK CU | 1.546(11) | CD CB CA  | 120.2(5)  |
| CL CQ | 1.501(9)  | CE CC CF  | 116.8(5)  |
| CL CS | 1.520(10) | CE CC CL  | 123.7(5)  |
| CL CT | 1.518(10) | CF CC CL  | 119.5(5)  |
| CO CP | 1.339(11) | CB CD CF  | 117.0(5)  |
|       |           | CB CD CK  | 122.3(6)  |
|       |           | CF CD CK  | 120.7(5)  |
|       |           | CC CE CA  | 121.8(5)  |
|       |           | CC CF CD  | 124.5(5)  |
|       |           | N6 CG CA  | 123.9(5)  |
|       |           | N8 CH O5  | 123.8(5)  |
|       |           | N8 CH CM  | 119.8(5)  |
|       |           | O5 CH CM  | 116.5(5)  |
|       |           | CO CJ CM  | 110.5(6)  |
|       |           | CR CK CD  | 113.6(6)  |
|       |           | CR CK CV  | 108.6(7)  |
|       |           | CD CK CV  | 109.3(6)  |
|       |           | CR CK CU  | 107.5(7)  |
|       |           | CD CK CU  | 109.5(6)  |
|       |           | CV CK CU  | 108.2(8)  |

|  |  |          |          |
|--|--|----------|----------|
|  |  | CQ CL CS | 108.6(6) |
|  |  | CQ CL CC | 112.0(5) |
|  |  | CS CL CC | 109.9(6) |
|  |  | CQ CL CT | 107.9(6) |
|  |  | CS CL CT | 109.1(6) |
|  |  | CC CL CT | 109.2(6) |
|  |  | CH CM CJ | 130.4(5) |
|  |  | CH CM S2 | 119.5(4) |
|  |  | CJ CM S2 | 110.0(4) |
|  |  | CP CO CJ | 114.8(6) |
|  |  | CO CP S2 | 112.4(5) |

**Table S2b** Selected bond lengths and angles of **M2**

| <b>Atoms</b> | <b>Bond length</b> | <b>Atoms</b>   | <b>Bond angle</b> |
|--------------|--------------------|----------------|-------------------|
| Mo01 O2      | 1.693(5)           | O2 Mo01 O1     | 106.6(2)          |
| Mo01 O1      | 1.695(4)           | O2 Mo01 O006   | 99.6(2)           |
| Mo01 O006    | 1.921(4)           | O1 Mo01 O006   | 104.34(19)        |
| Mo01 O004    | 2.024(4)           | O2 Mo01 O004   | 97.6(2)           |
| Mo01 N007    | 2.231(4)           | O1 Mo01 O004   | 95.97(19)         |
| Mo01 O005    | 2.351(4)           | O006 Mo01 O004 | 148.25(16)        |
| S1 C00J      | 1.576(8)           | O2 Mo01 N007   | 94.3(2)           |
| S1 C00F      | 1.668(6)           | O1 Mo01 N007   | 157.0(2)          |
| C1 C00K      | 1.567(8)           | O006 Mo01 N007 | 81.05(16)         |
| C1 C00F      | 1.618(6)           | O004 Mo01 N007 | 71.20(14)         |
| O004 C00C    | 1.307(6)           | O2 Mo01 O005   | 170.6(2)          |
| O005 C00M    | 1.478(8)           | O1 Mo01 O005   | 82.46(19)         |
| O006 C00G    | 1.344(7)           | O006 Mo01 O005 | 80.21(17)         |
| N007 C00E    | 1.290(7)           | O004 Mo01 O005 | 78.54(16)         |
| N007 N009    | 1.399(6)           | N007 Mo01 O005 | 76.36(15)         |
| N009 C00C    | 1.306(7)           | C00J S1 C00F   | 94.1(4)           |
| O3 C00H      | 1.417(8)           | C00K C1 C00F   | 94.7(4)           |
| O3 C00O      | 1.411(8)           | C00C O004 Mo01 | 120.2(3)          |
| C00C C00F    | 1.456(7)           | C00M O005 Mo01 | 121.6(4)          |
| C00D C00G    | 1.368(9)           | C00G O006 Mo01 | 131.6(4)          |
| C00D C00L    | 1.438(8)           | C00E N007 N009 | 116.7(4)          |

|           |           |                |          |
|-----------|-----------|----------------|----------|
| C00D C00E | 1.449(8)  | C00E N007 M001 | 126.4(4) |
| C00G C00H | 1.434(7)  | N009 N007 M001 | 116.5(3) |
| C00H C00I | 1.383(10) | C00C N009 N007 | 108.5(4) |
| C00I C00N | 1.335(12) | C00H O3 C00O   | 116.0(6) |
| C00J C00K | 1.346(12) | N009 C00C O004 | 123.5(5) |
| C00L C00N | 1.361(11) | N009 C00C C00F | 120.7(5) |
| C00O C00P | 1.531(13) | O004 C00C C00F | 115.8(4) |
|           |           | C00G C00D C00L | 118.7(6) |
|           |           | C00G C00D C00E | 123.3(5) |
|           |           | C00L C00D C00E | 118.0(6) |
|           |           | N007 C00E C00D | 123.0(5) |
|           |           | C00C C00F C1   | 120.6(4) |
|           |           | C00C C00F S1   | 123.0(4) |
|           |           | C1 C00F S1     | 116.3(3) |
|           |           | O006 C00G C00H | 116.4(5) |
|           |           | O006 C00G C00D | 123.3(5) |
|           |           | C00H C00G C00D | 120.2(5) |
|           |           | O3 C00H C00G   | 115.9(6) |
|           |           | O3 C00H C00I   | 126.8(6) |
|           |           | C00G C00H C00I | 117.3(6) |
|           |           | C00N C00I C00H | 123.2(7) |
|           |           | C00K C00J S1   | 116.5(5) |
|           |           | C00J C00K C1   | 118.3(5) |
|           |           | C00N C00L C00D | 120.0(7) |
|           |           | C00I C00N C00L | 120.4(7) |
|           |           | O3 C00O C00P   | 107.7(7) |

**Table S3a** Selected DFT parameters of **L1**, **M1** and **C1**

| <b>Compounds</b> →     | <b>L1</b> | <b>M1</b> | <b>C1</b> |
|------------------------|-----------|-----------|-----------|
| <b>Parameters</b> ↓    |           |           |           |
| Multiplicity           | 1         | 2         | 1         |
| No. of electrons       | 192       | 257       | 280       |
| No. of alpha electrons | 96        | 115       | 126       |
| No. of beta electrons  | 96        | 114       | 126       |

|                              |                         |                           |                           |
|------------------------------|-------------------------|---------------------------|---------------------------|
| No. basis functions          | 281                     | 377                       | 520                       |
| No. of independent functions | 281                     | 377                       | 520                       |
| No. of point charges         | 0                       | 0                         | 0                         |
| No. of translation vectors   | 0                       | 0                         | 0                         |
| No. of atoms                 | 51                      | 54                        | 49                        |
| Calculation type             | SP                      | SP                        | OPT                       |
| Calculation method           | TD RB3LYP               | TD RB3LYP                 | OPT RB3LYP                |
| Basis set                    | 6-31G                   | SDD                       | 6-31g(d)+sdd              |
| Charge                       | 0                       | 0                         | 0                         |
| Spin                         | singlet                 | doublet                   | singlet                   |
| Solvation                    | None                    | None                      | None                      |
| Dipole moment                | 6.7620 Debye            | 12.7086 Debye             | 8.8303 Debye              |
| Point group                  | C1                      | C1                        | C1                        |
| RMS Gradient Norm            | 0 Hartree/Bohr          | 0 Hartree/Bohr            | 0 Hartree/Bohr            |
| E(TD-HF/TD-DFT) in -ve       | 1435.111368<br>Hartrees | 1728.59856935<br>Hartrees | 2024.73585870<br>Hartrees |

**Table S3b** Selected DFT parameters of **L2**, **M2** and **A1**

| <b>Compounds</b><br><b>Parameters</b> ↓ → | <b>L2</b> | <b>M2</b> | <b>A1</b> |
|-------------------------------------------|-----------|-----------|-----------|
| Multiplicity                              | 1         | 1         | 1         |
| No. of electrons                          | 152       | 198       | 216       |
| No. of alpha electrons                    | 76        | 99        | 70        |
| No. of beta electrons                     | 76        | 99        | 70        |
| No. basis functions                       | 212       | 319       | 231       |
| No. of independent functions              | 212       | 319       | 231       |
| No. of point charges                      | 0         | 0         | 0         |
| No. of translation vectors                | 0         | 0         | 0         |
| No. of atoms                              | 34        | 41        | 33        |

|                        |                           |                           |                           |
|------------------------|---------------------------|---------------------------|---------------------------|
| Calculation type       | SP                        | SP                        | SP                        |
| Calculation method     | TD RB3LYP                 | TD RB3LYP                 | TD RB3LYP                 |
| Basis set              | 6-31G                     | SDD                       | SDD                       |
| Charge                 | 0                         | 0                         | 0                         |
| Spin                   | Singlet                   | Singlet                   | Singlet                   |
| Solvation              | None                      | None                      | None                      |
| Dipole movement        | 5.4635 Debye              | 9.9011Debyee              | 11.8197 Debyee            |
| Point group            | C1                        | C1                        | C1                        |
| RMS Gradient Norm      | 0 Hartree/Bohr            | 0 Hartree/Bohr            | 0 Hartree/Bohr            |
| E(TD-HF/TD-DFT) in -ve | 1274.57133864<br>Hartrees | 1607.96370844<br>Hartrees | 943.467667363<br>Hartrees |
